# Supplementary material for: Design, Synthesis and Bioactivity Evaluation of 4,6-Disubstituted Pyrido[3,2-d]pyrimidine Derivatives as Mnk and HDAC Inhibitors
Source: MDPI journal article supplement (doi:10.3390/molecules25184318), 2020-09-21
Supplement: s1 [file s1]

# Design, Synthesis and Bioactivity Evaluation of 4,6-disubstituted pyrido[3,2-*d*]pyrimidine Derivatives as Mnk and HDAC inhibitors

Kun Xing, Jian Zhang, Yu Han, Tong Tong, Dan Liu\* and Linxiang Zhao\*

Key Laboratory of Structure-Based Drug Design & Discovery of Ministry of Education,  
Shenyang Pharmaceutical University, Shenyang 110016, China;

Correspondence: sammyld@163.com (D.L.); linxiang.zhao@vip.sina.com (L.Z.); Tel.: +024-4352-0221 (L.Z.)

## 1. Spectrum of target compounds

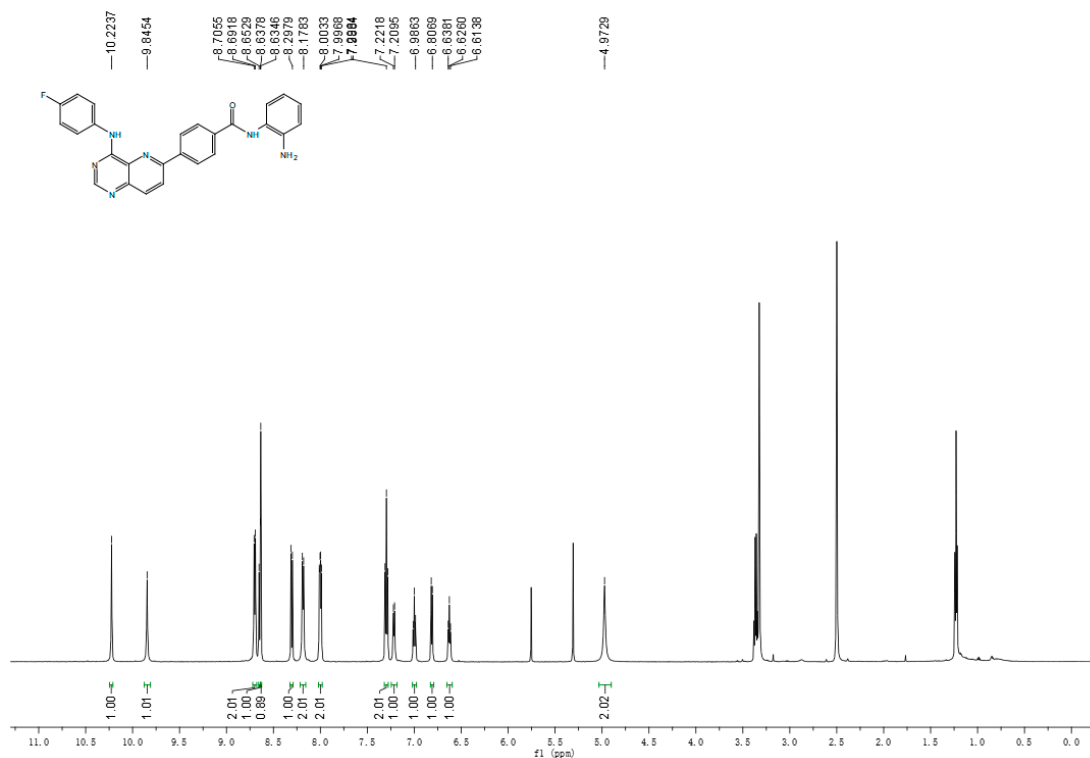

$^1\text{H}$ -NMR spectra of compound A01

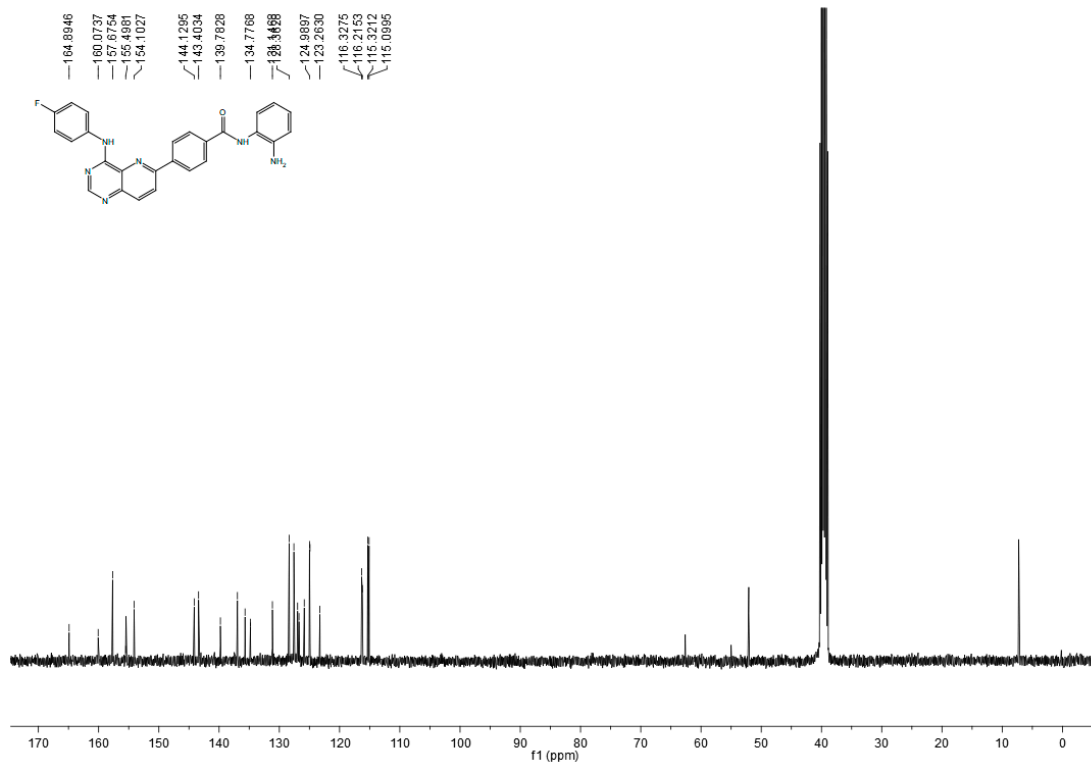

$^{13}\text{C}$ -NMR spectra of compound A01

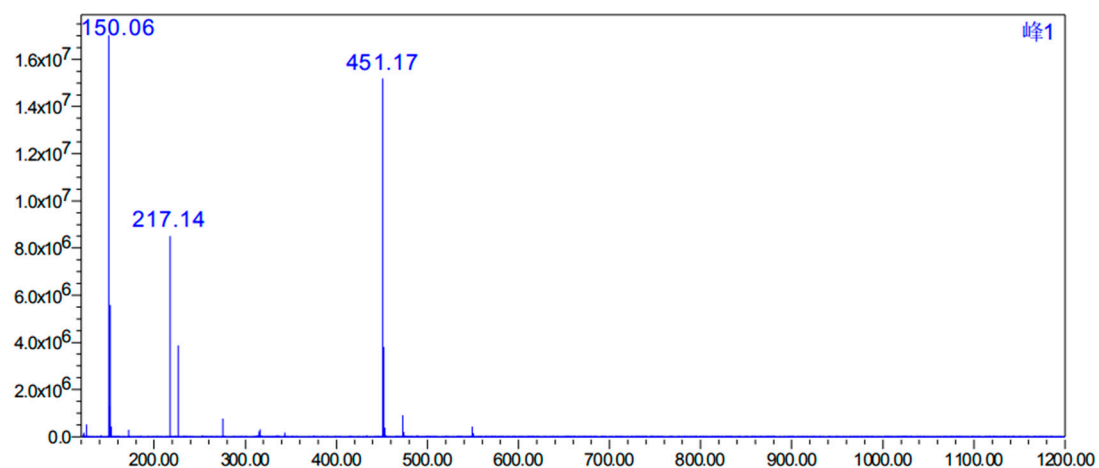

### Ms spectra of compound A01

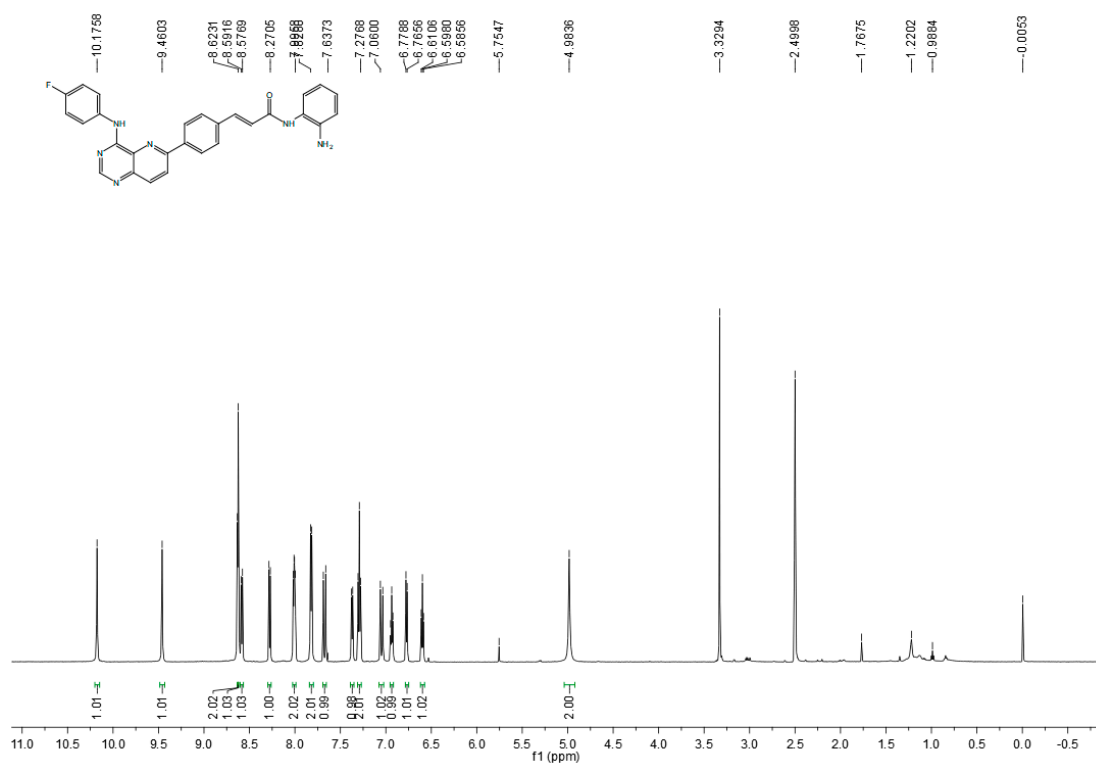

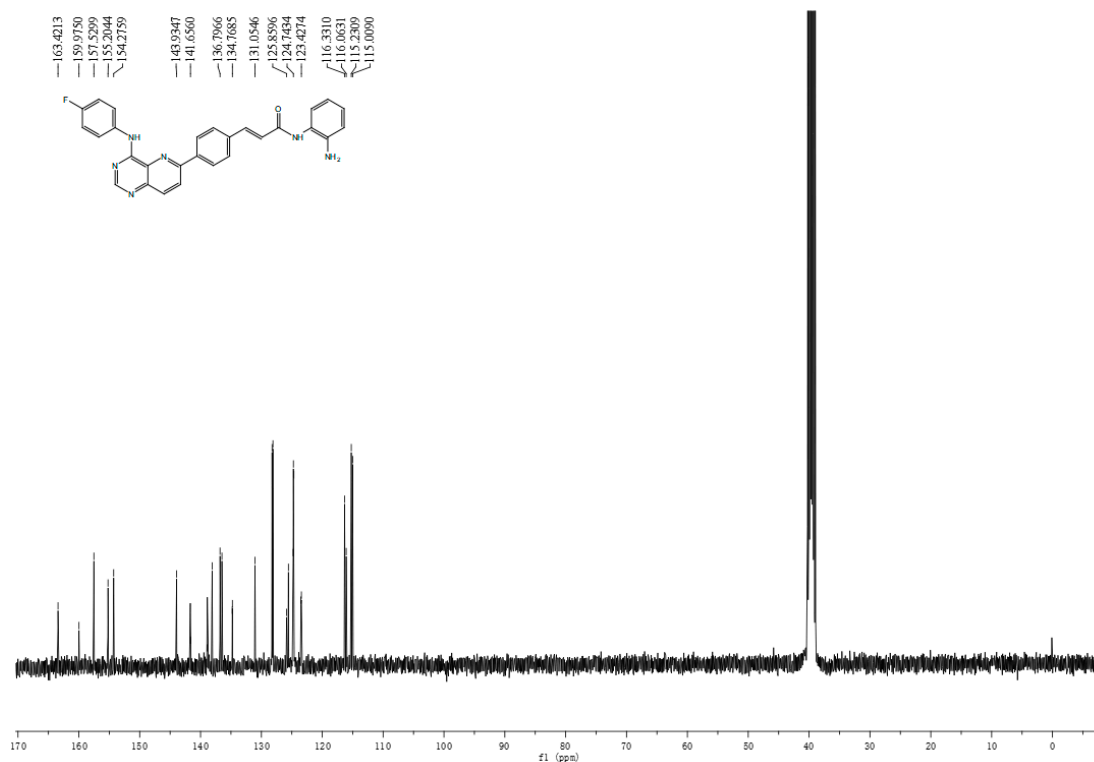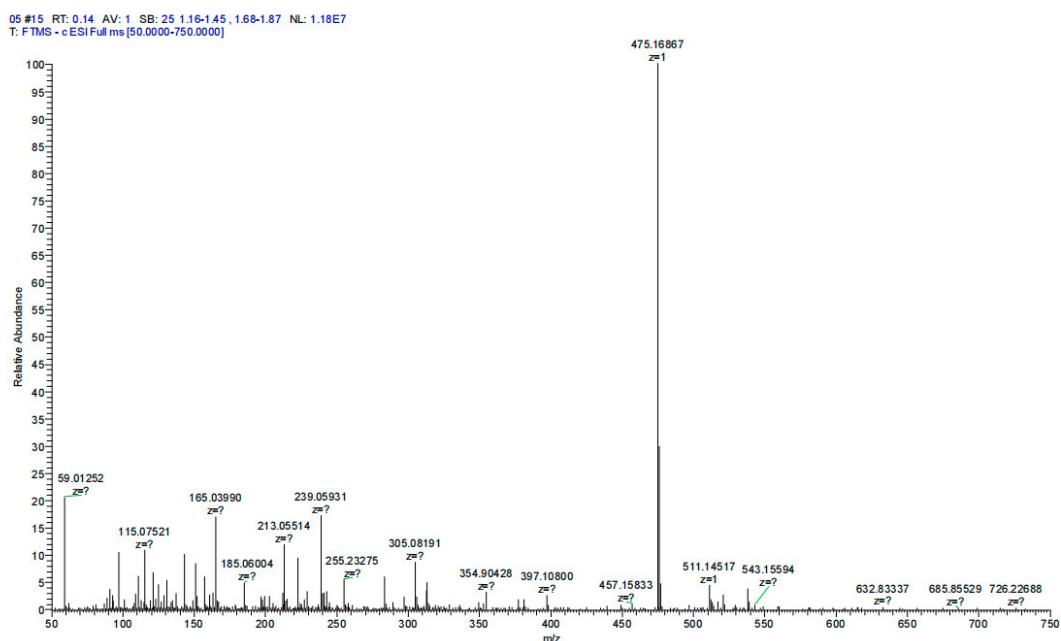

### Ms spectra of compound A02

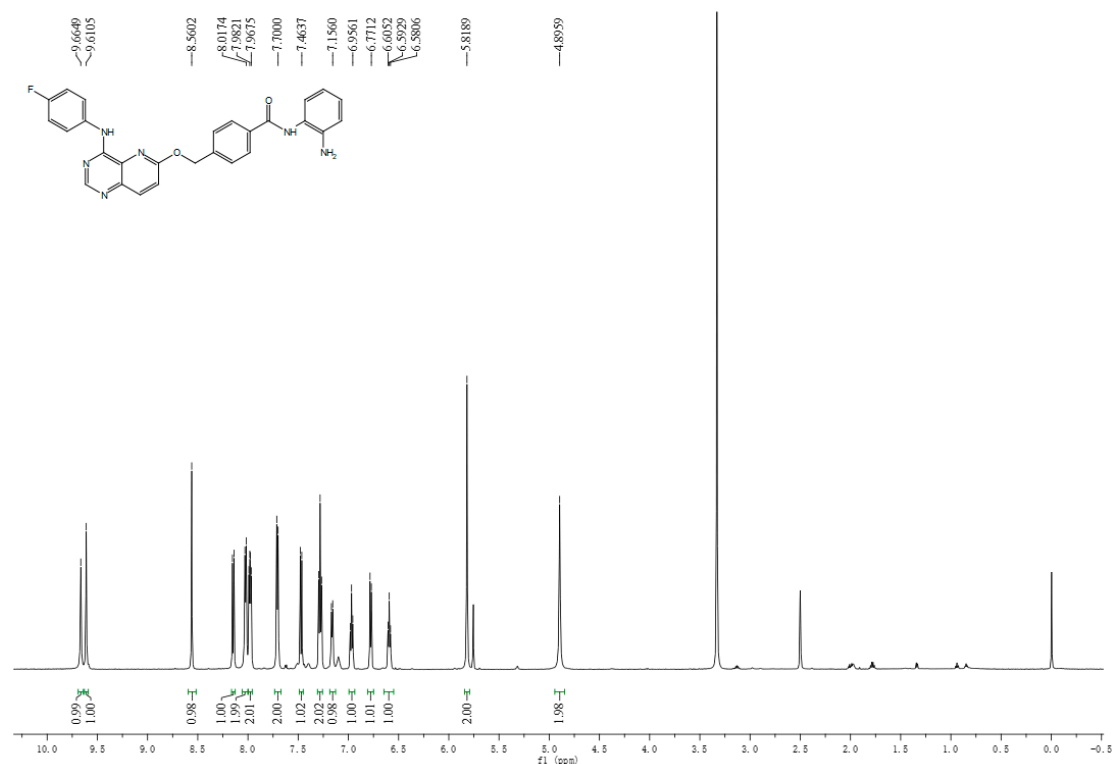

**<sup>1</sup>H-NMR spectra of compound A03**

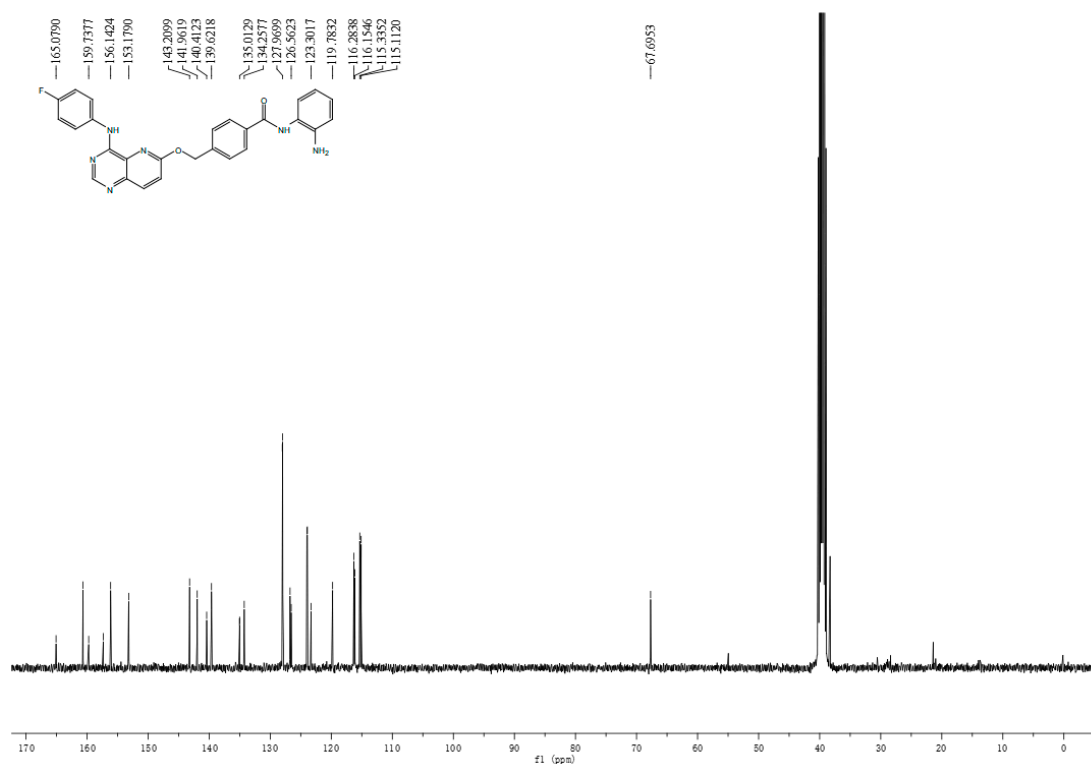

**<sup>13</sup>C-NMR spectra of compound A03**

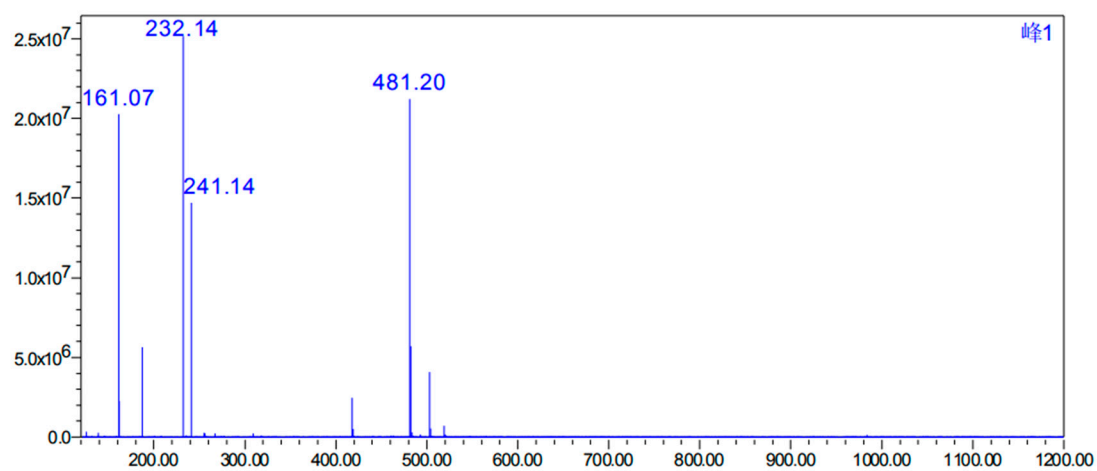

Ms spectra of compound A03

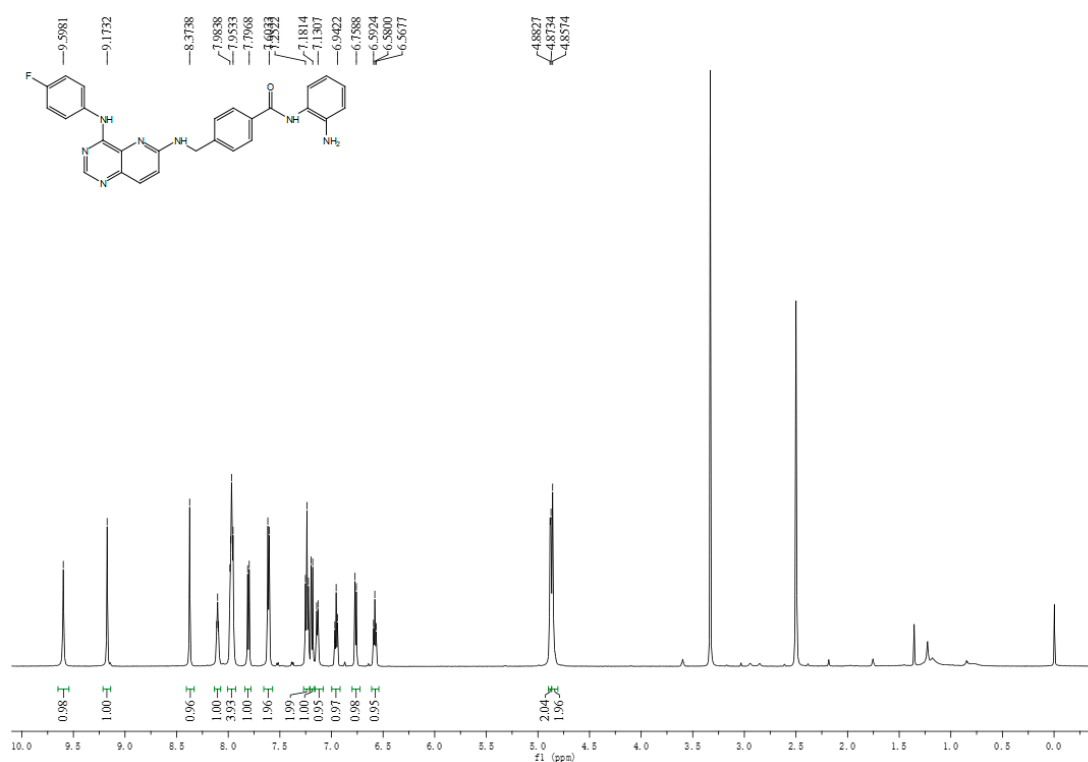

**<sup>1</sup>H-NMR spectra of compound A04**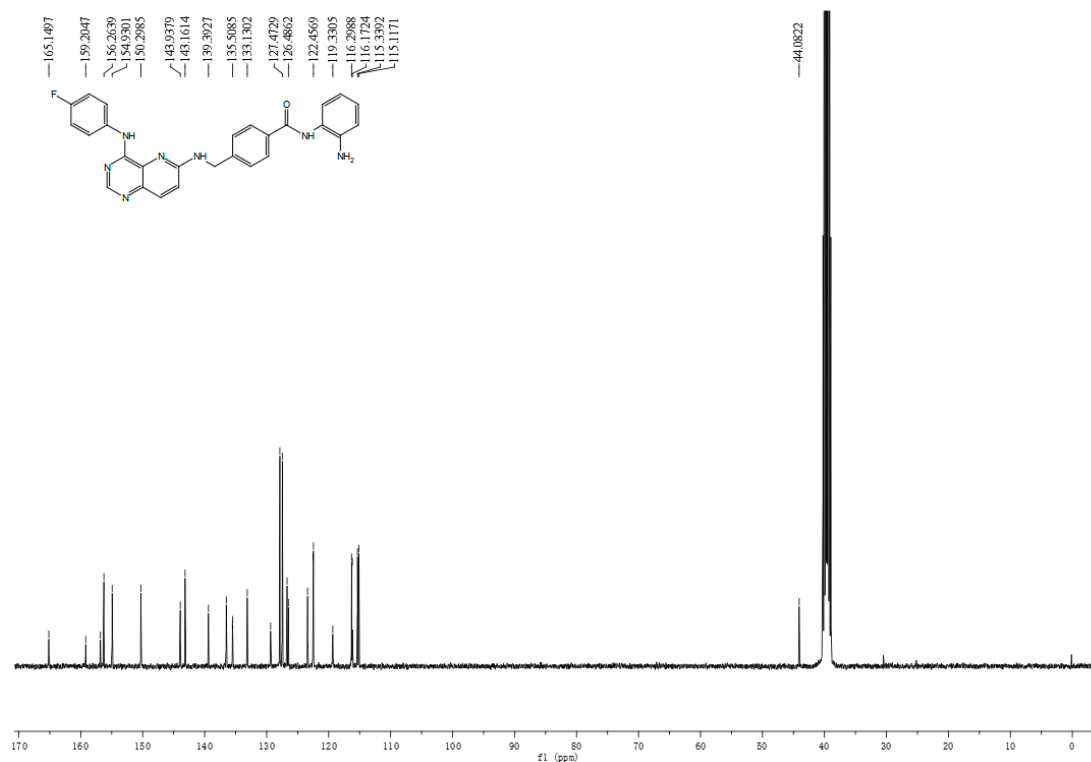**<sup>13</sup>C-NMR spectra of compound A04**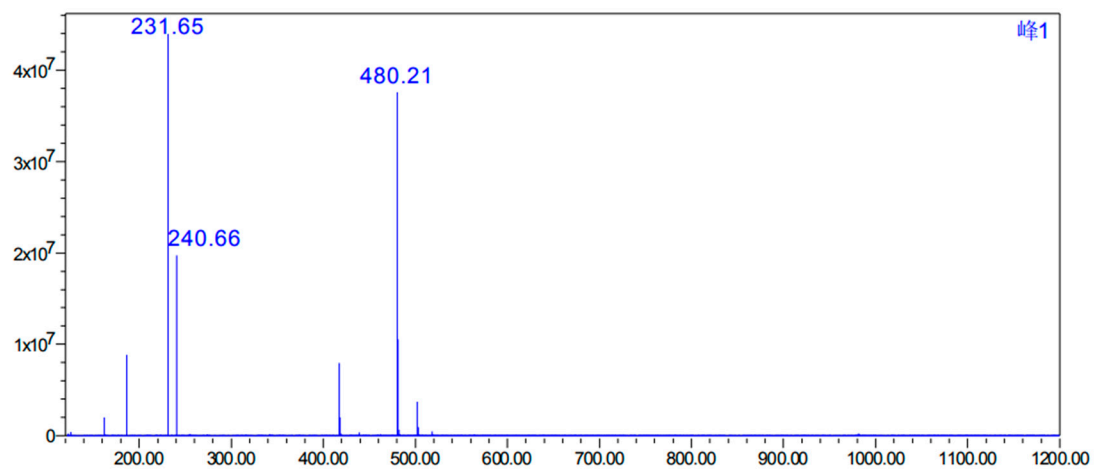**Ms spectra of compound A04**

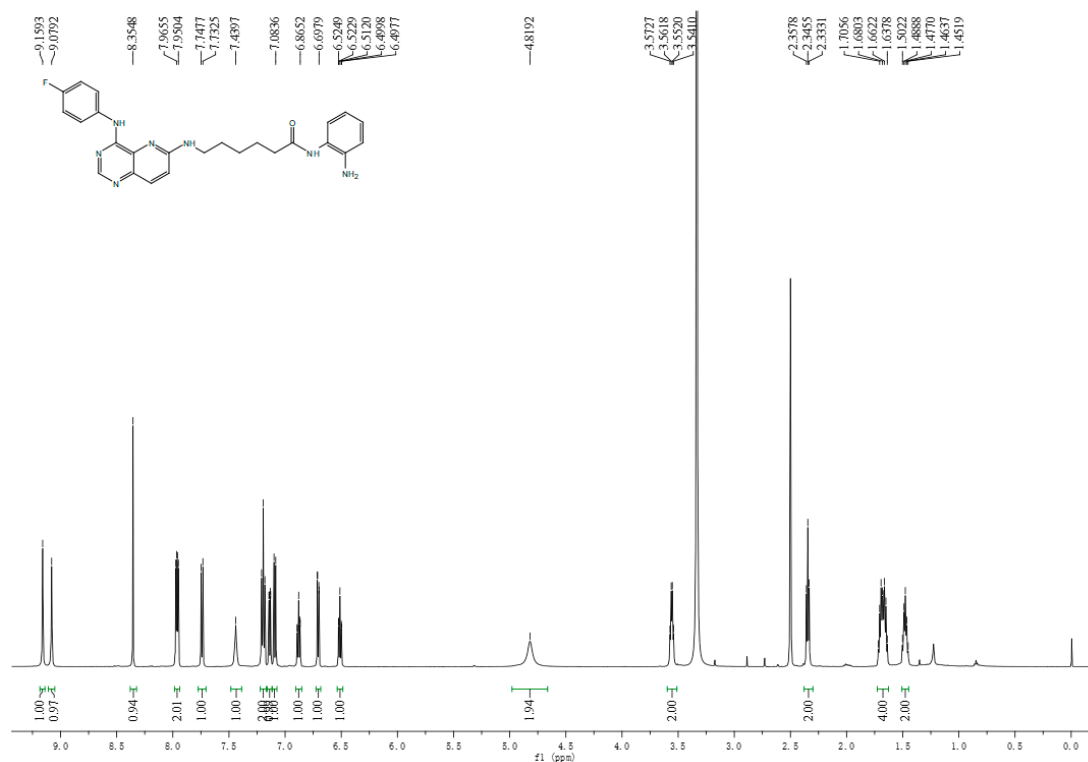

<sup>1</sup>H-NMR spectra of compound A05

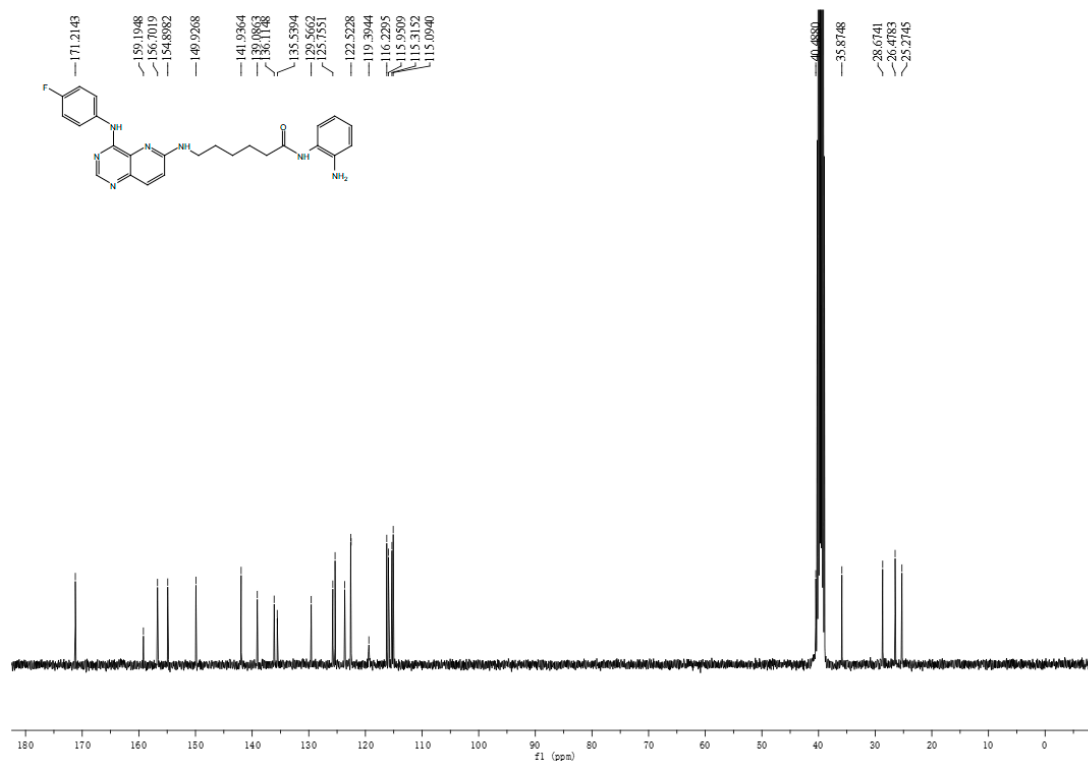

<sup>13</sup>C-NMR spectra of compound A05



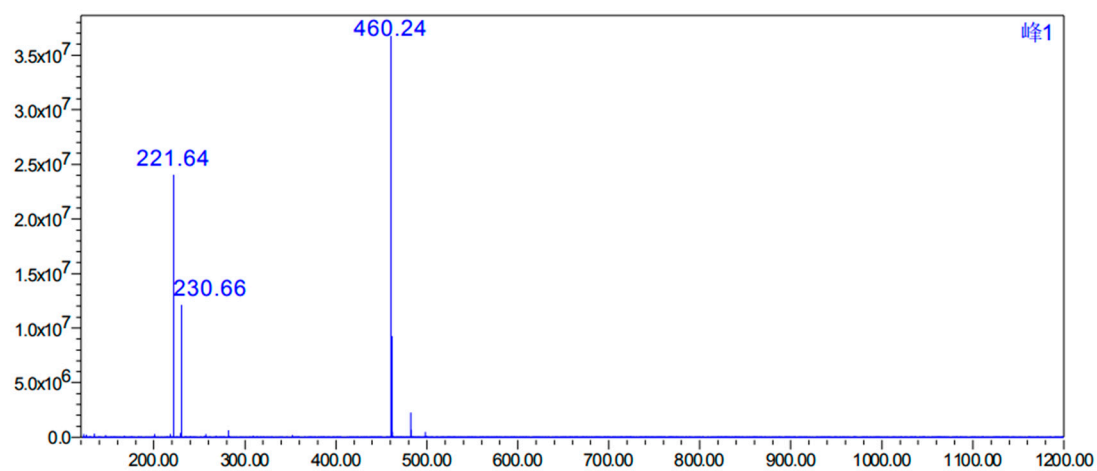

Ms spectra of compound A05

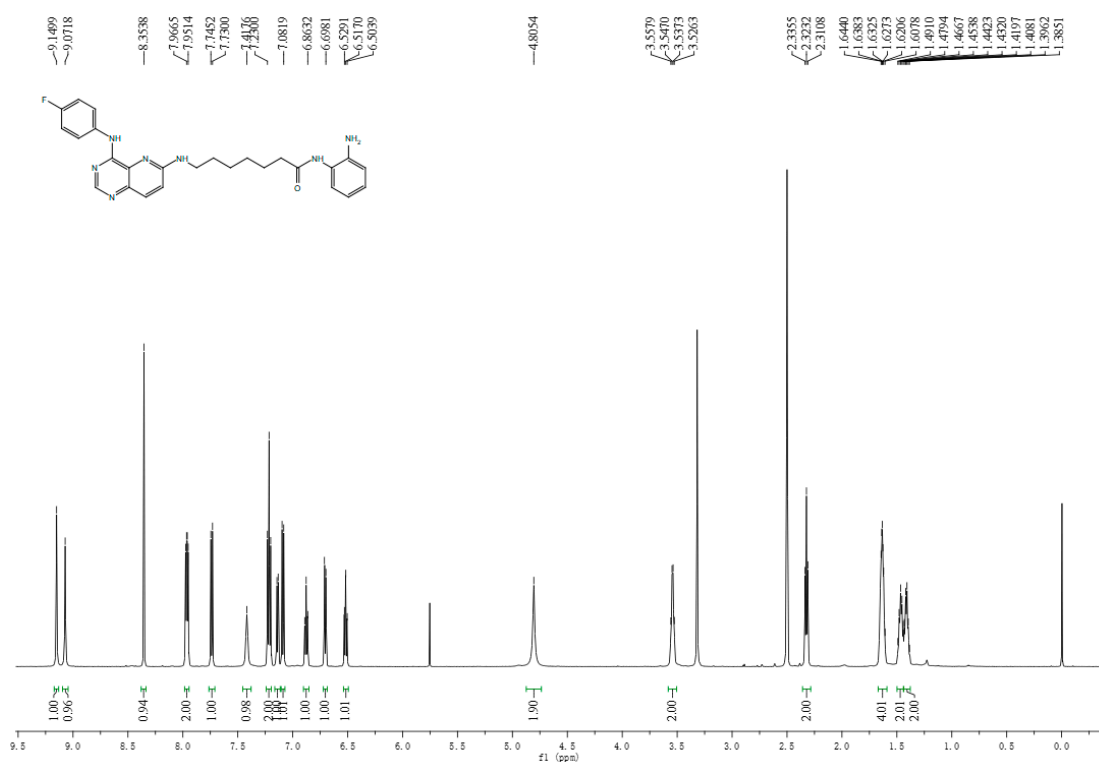

**<sup>1</sup>H-NMR spectra of compound A06**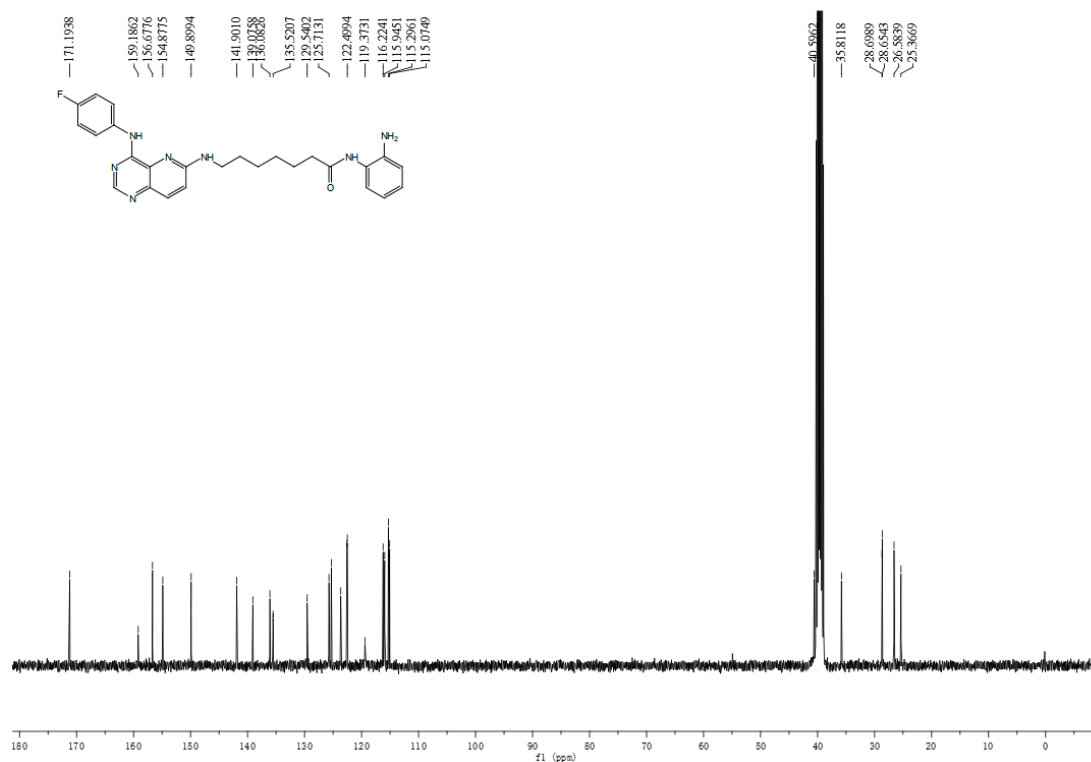**<sup>13</sup>C-NMR spectra of compound A06**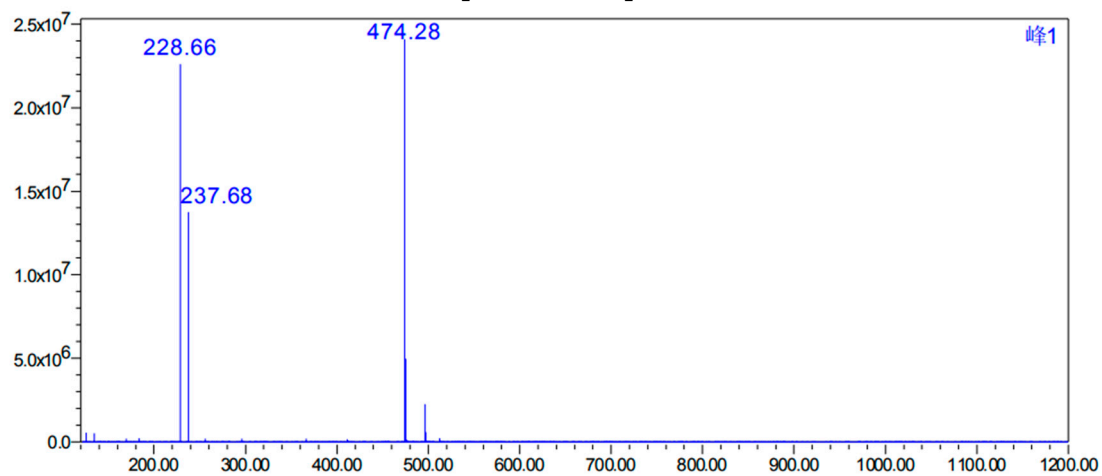**Ms spectra of compound A06**

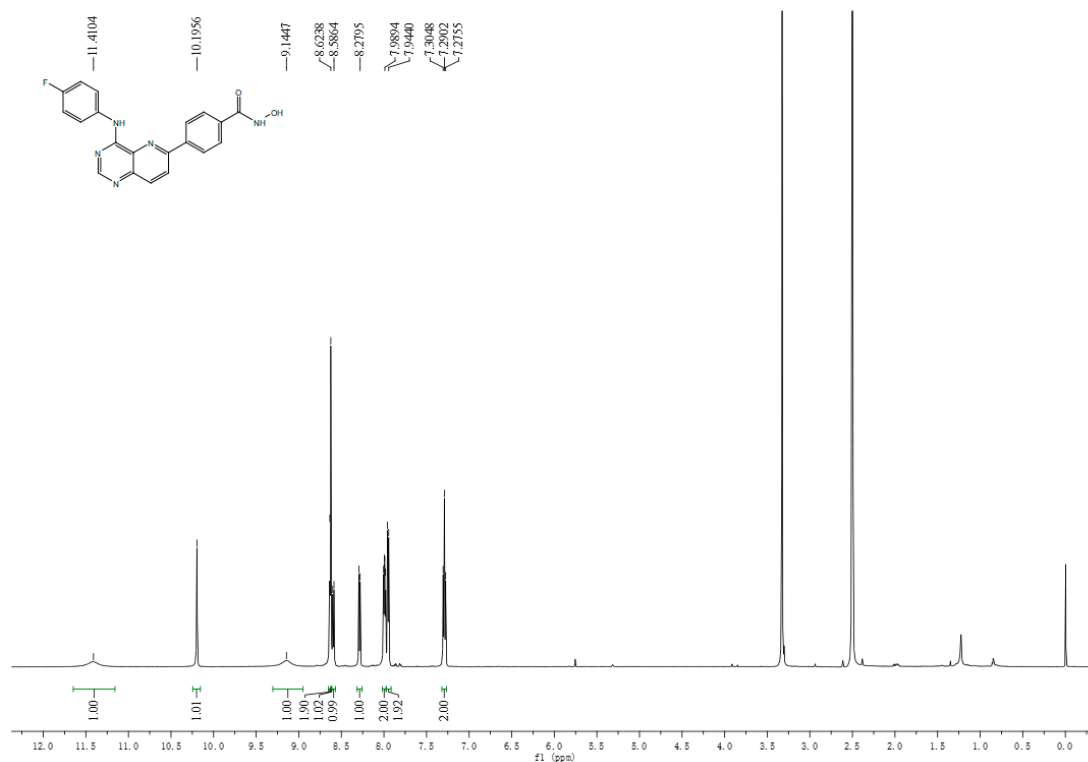**<sup>1</sup>H-NMR spectra of compound A07**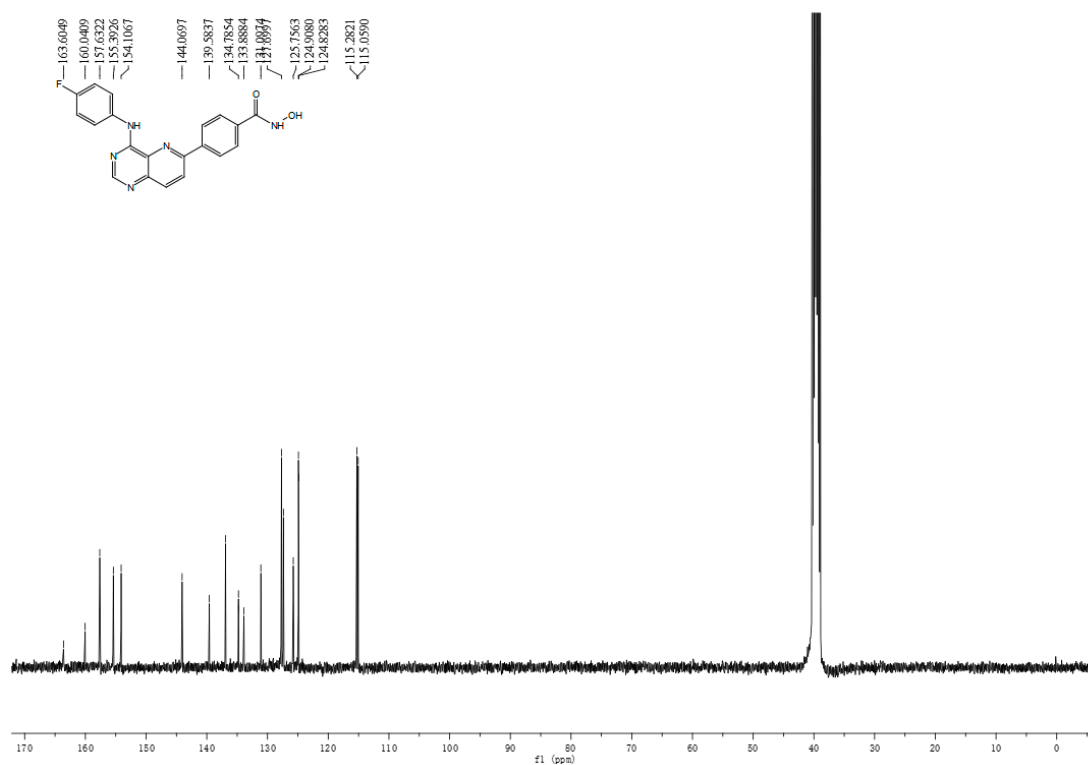**<sup>13</sup>C-NMR spectra of compound A07**

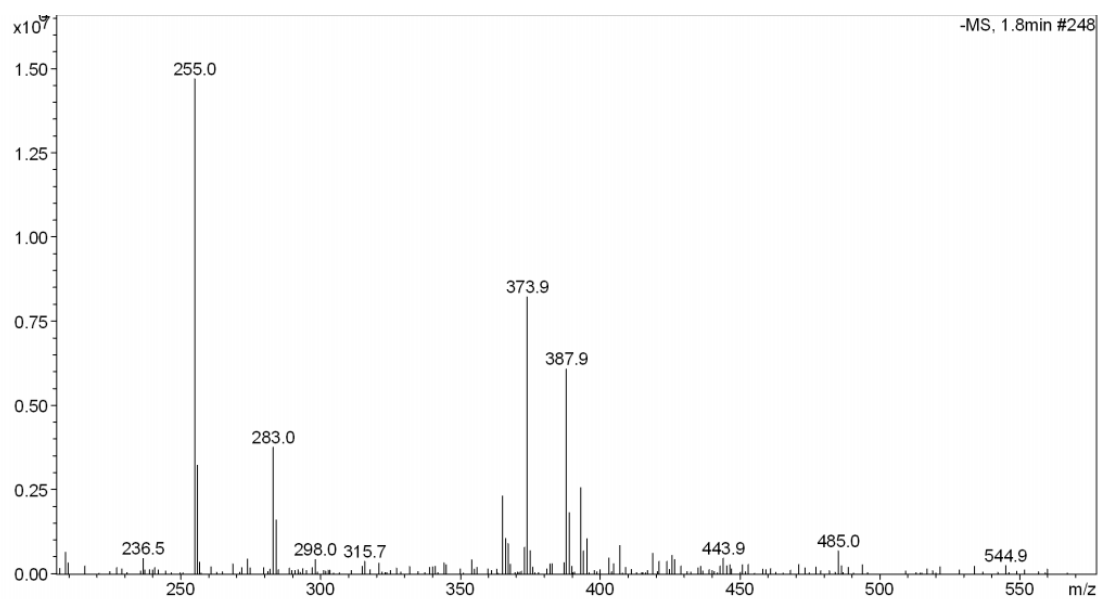

Ms spectra of compound A07

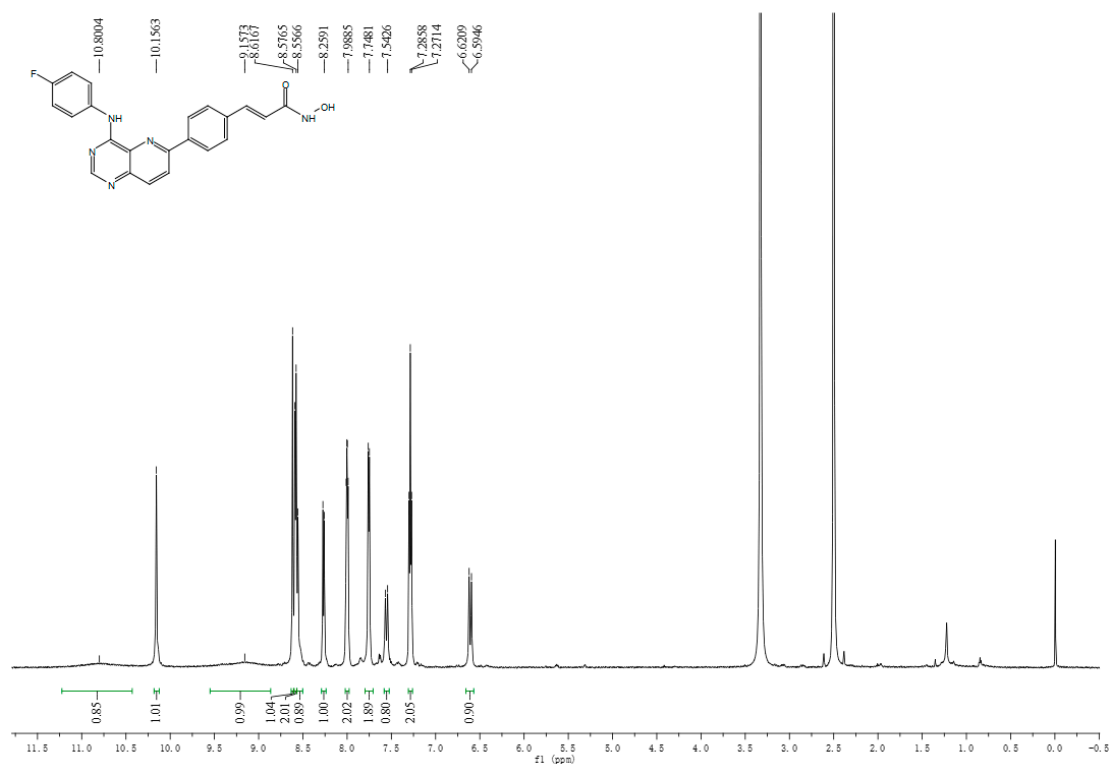

**<sup>1</sup>H-NMR spectra of compound A08**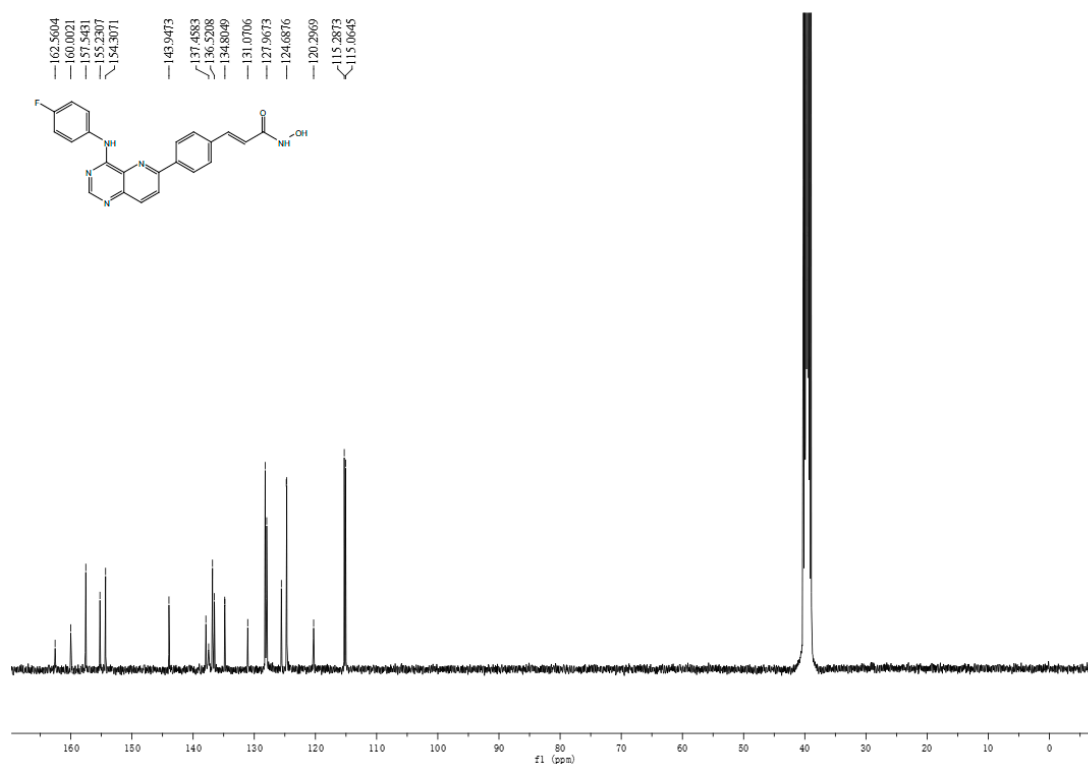**<sup>13</sup>C-NMR spectra of compound A08**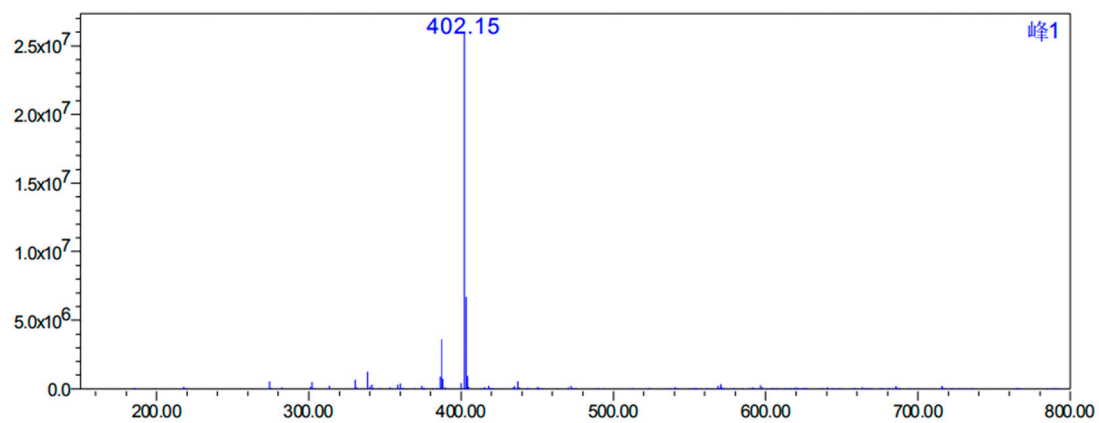**Ms spectra of compound A08**

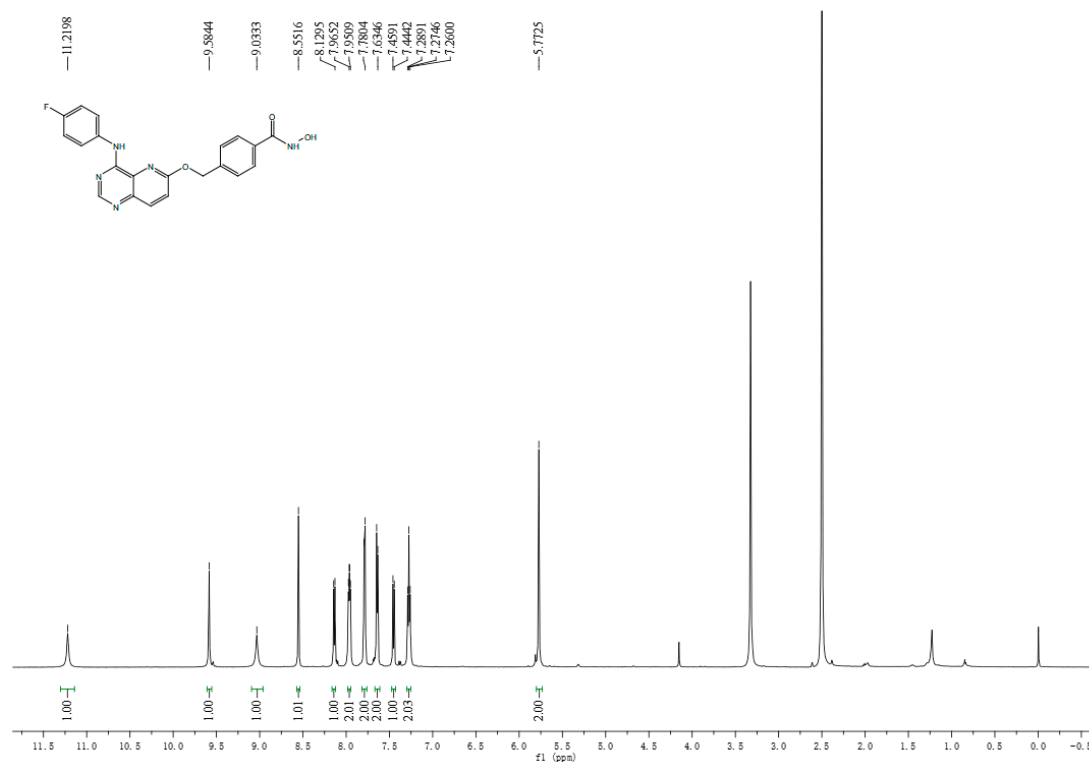

**<sup>1</sup>H-NMR spectra of compound A09**

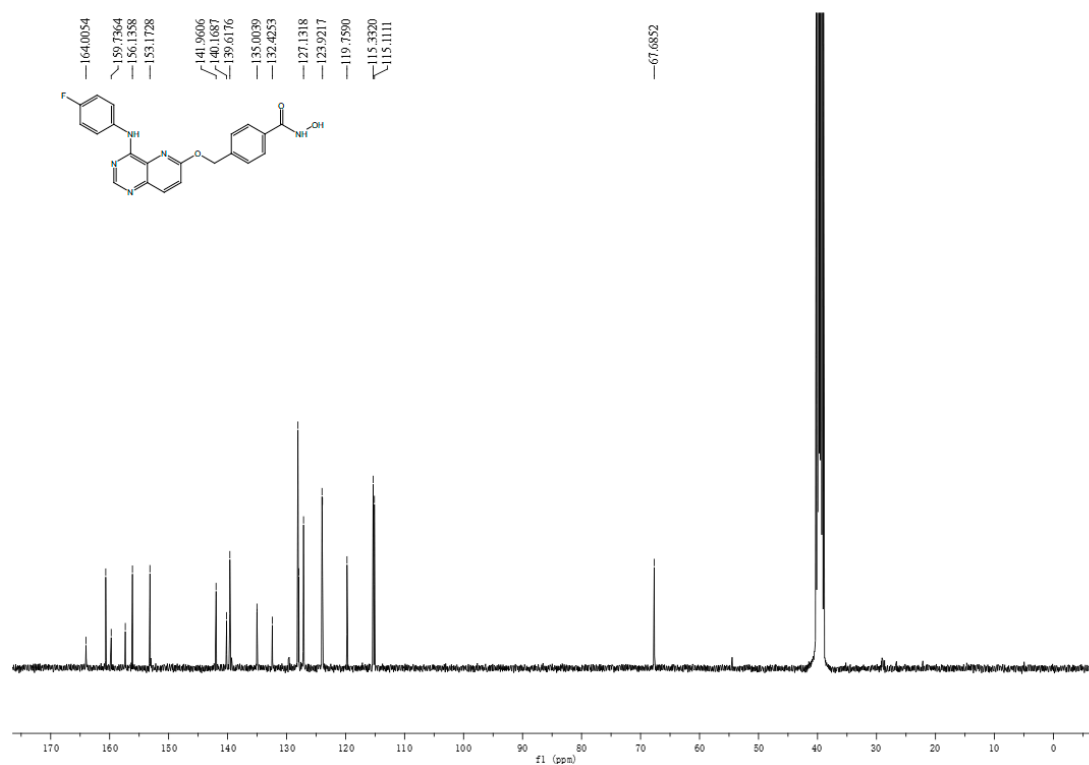

**<sup>13</sup>C-NMR spectra of compound A09**

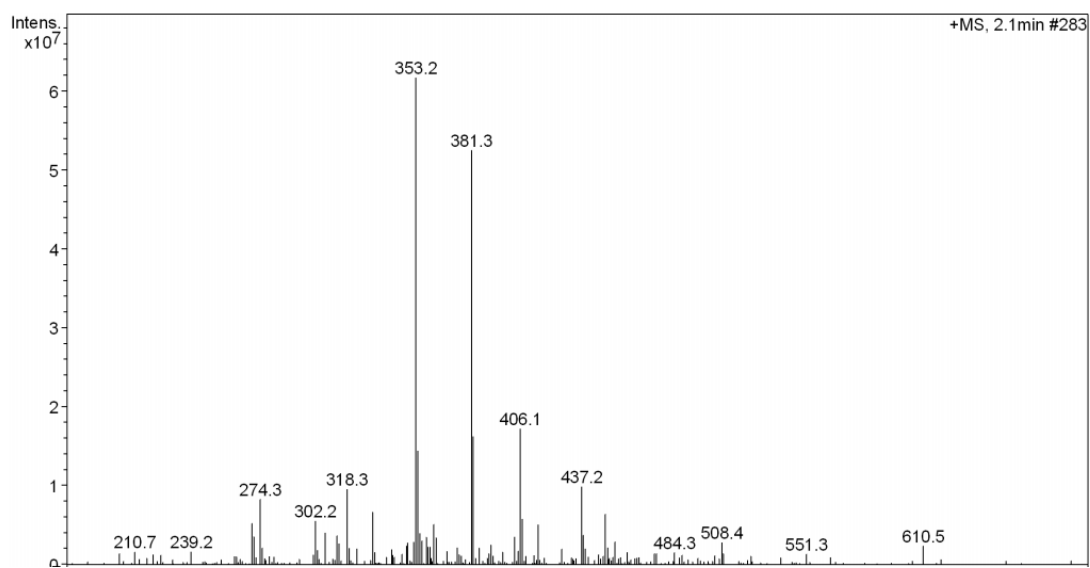

Ms spectra of compound A09

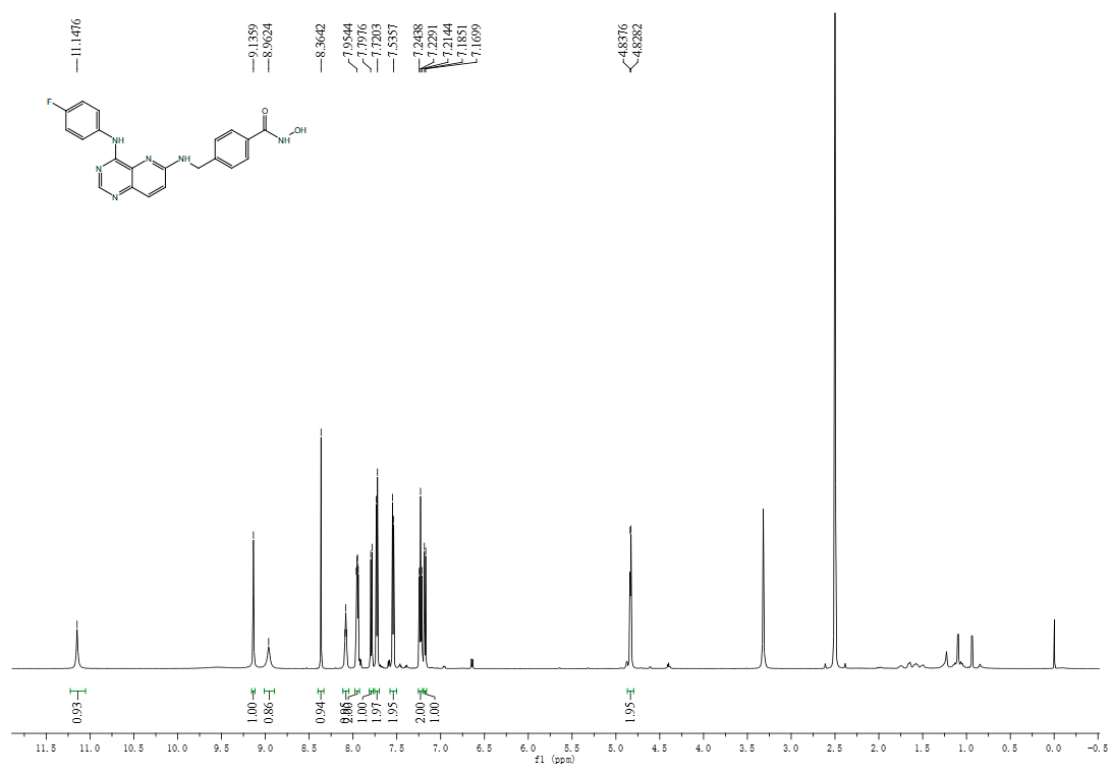

**<sup>1</sup>H-NMR spectra of compound A10**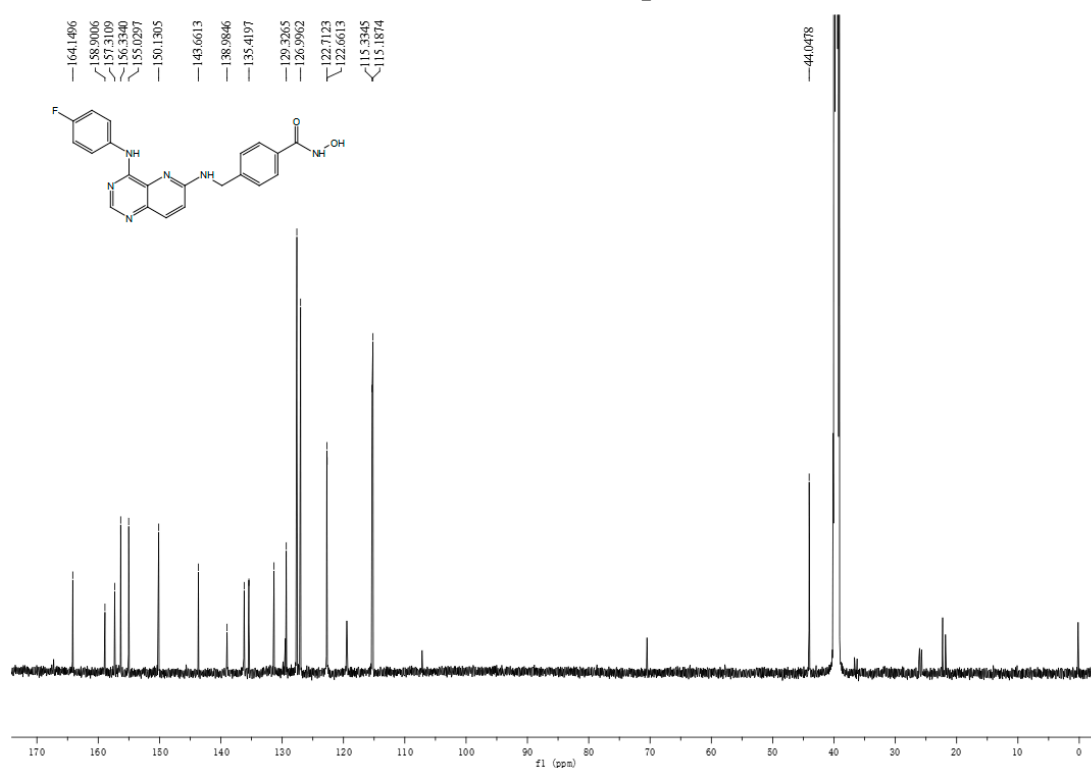**<sup>13</sup>C-NMR spectra of compound A10**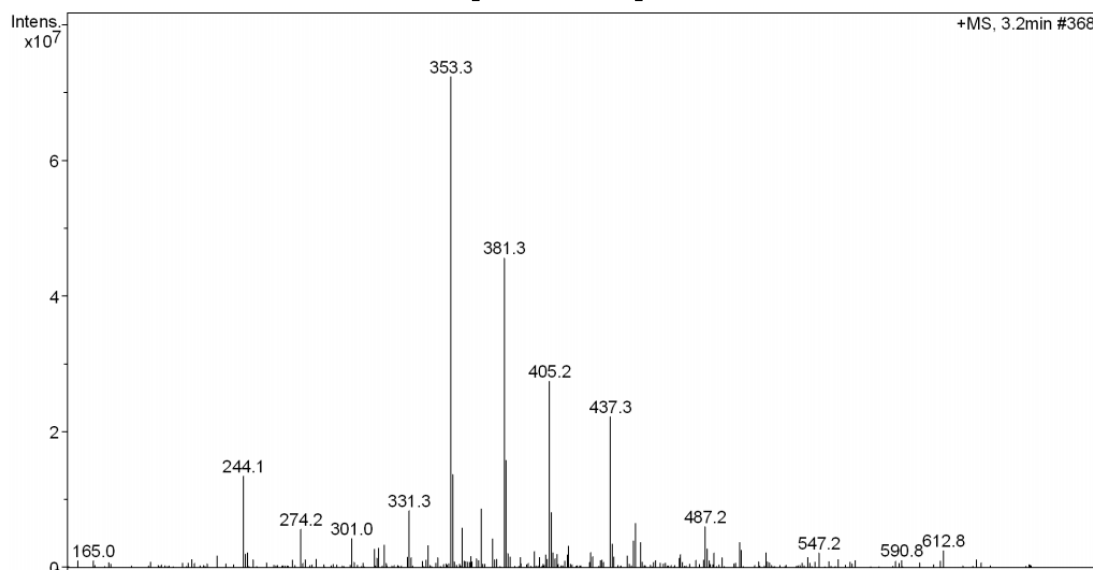**Ms spectra of compound A10**



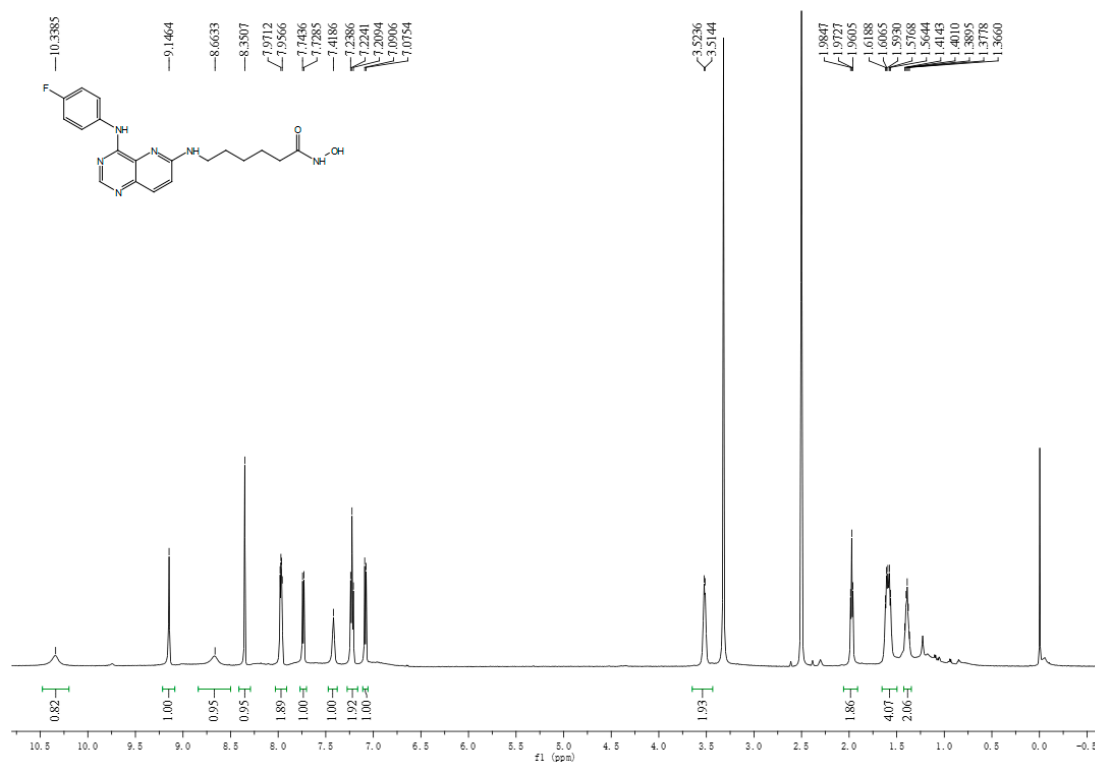

<sup>1</sup>H-NMR spectra of compound A11

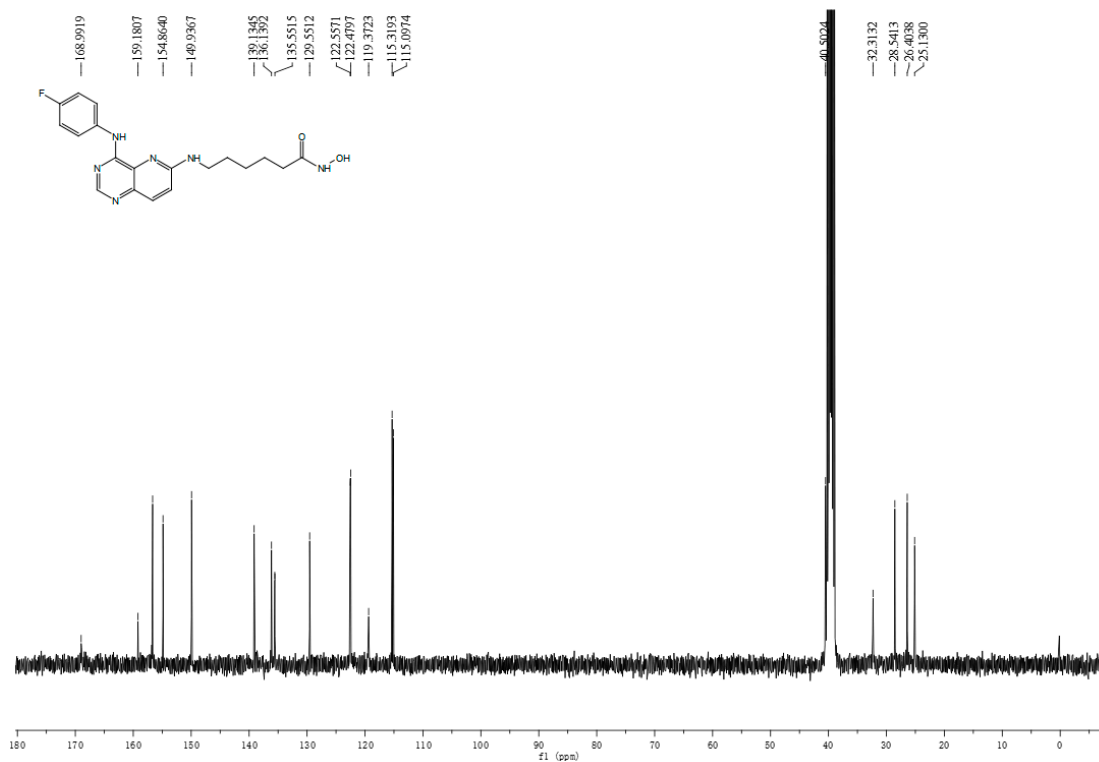

<sup>13</sup>C-NMR spectra of compound A11

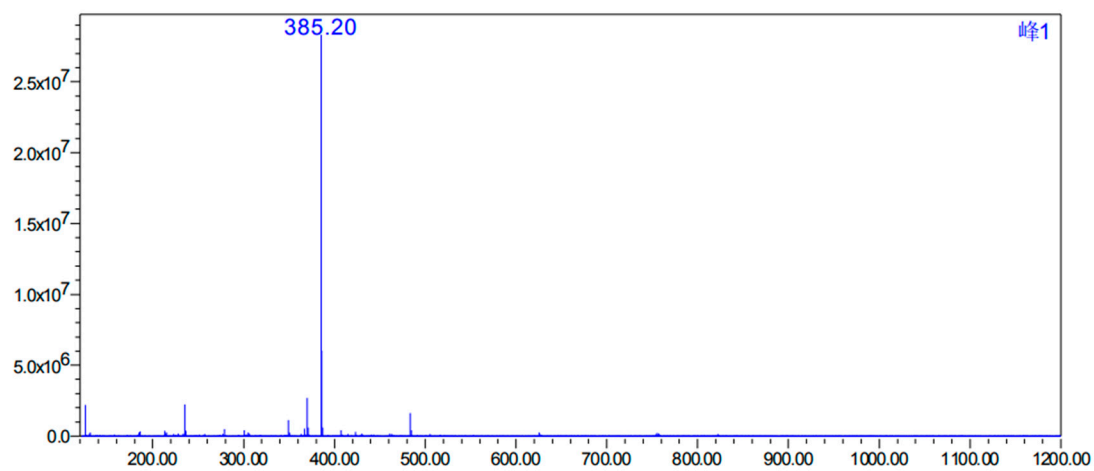

Ms spectra of compound A11

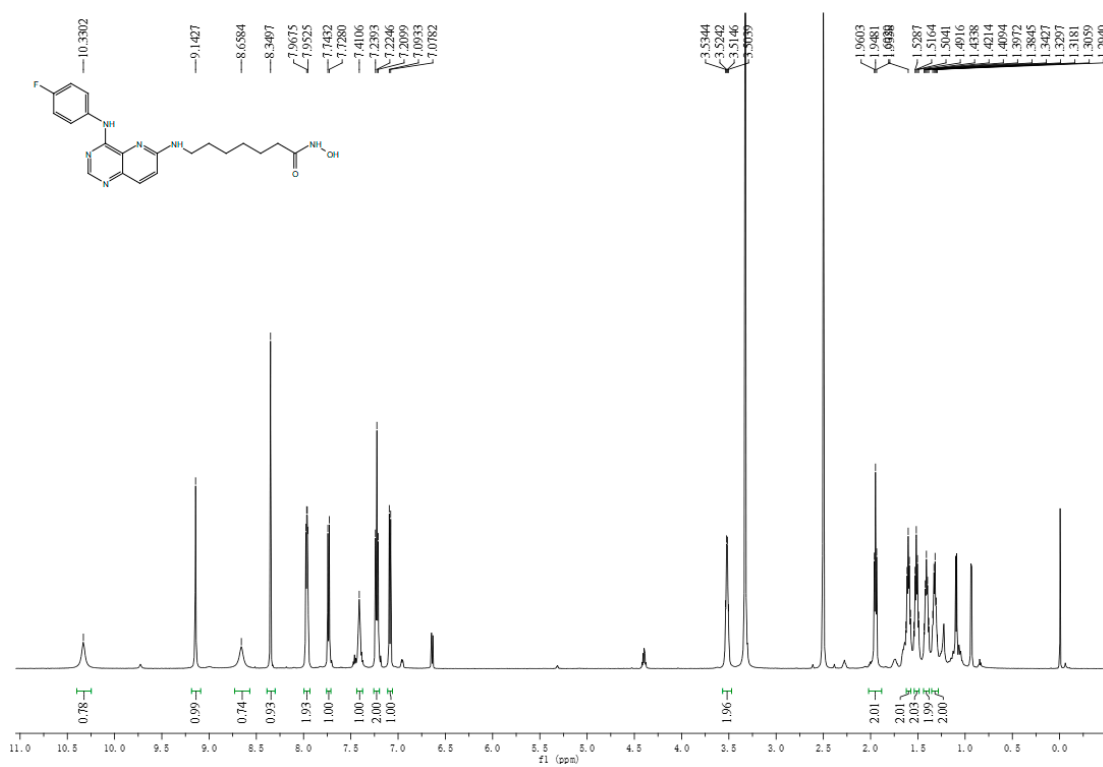

**<sup>1</sup>H-NMR spectra of compound A12**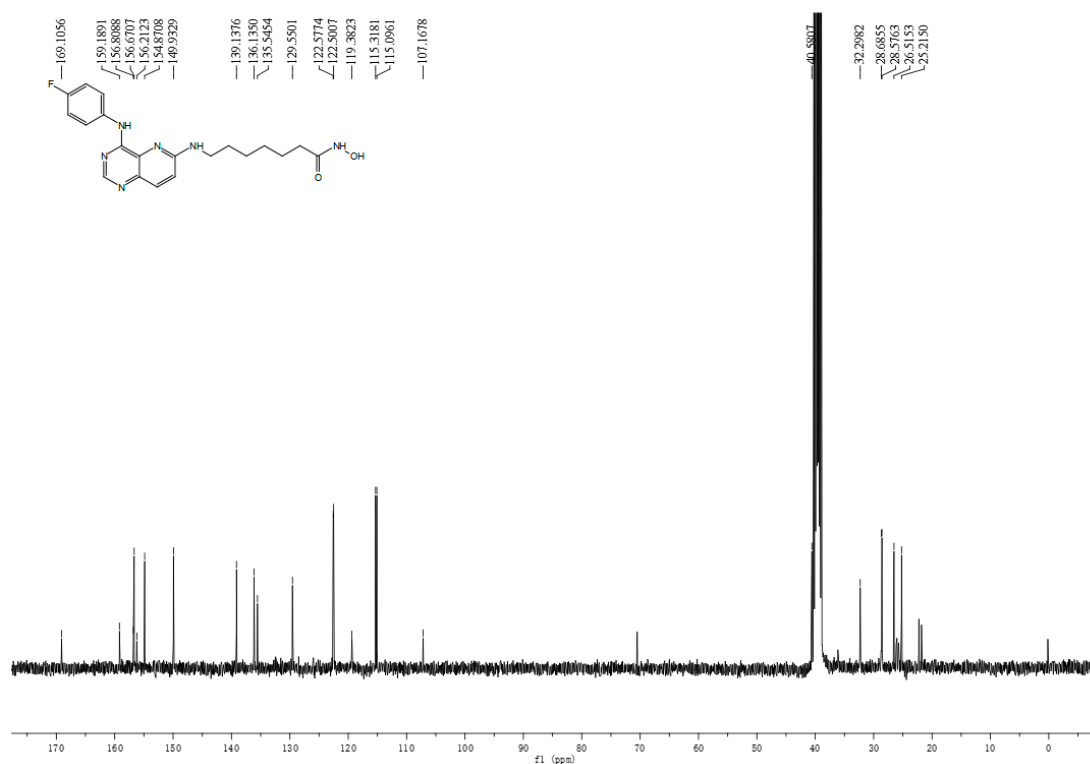**<sup>13</sup>C-NMR spectra of compound A12**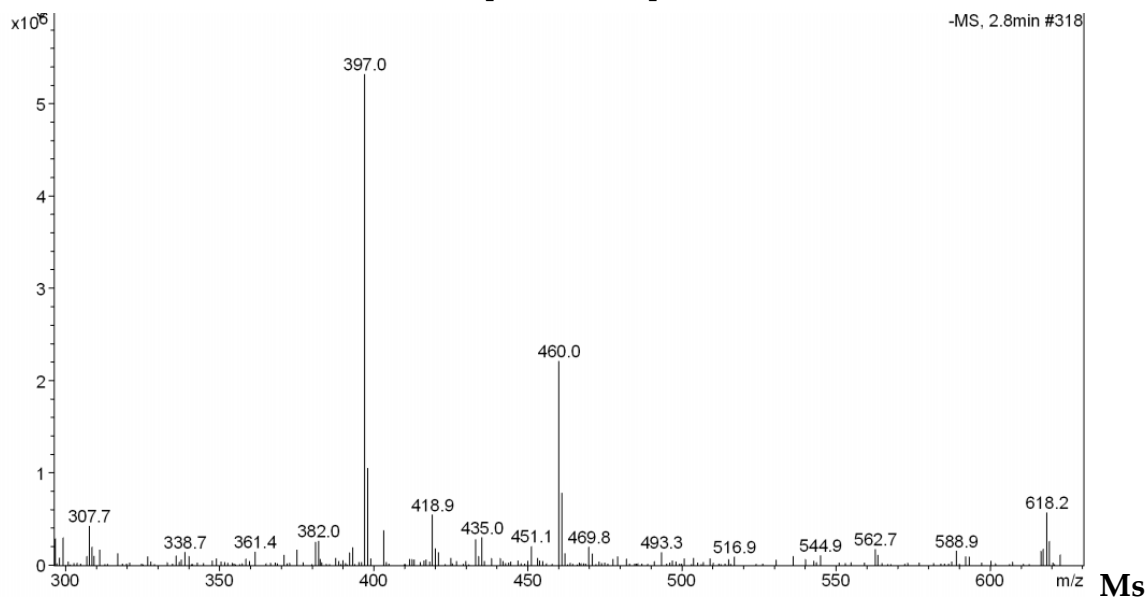**spectra of compound A12**

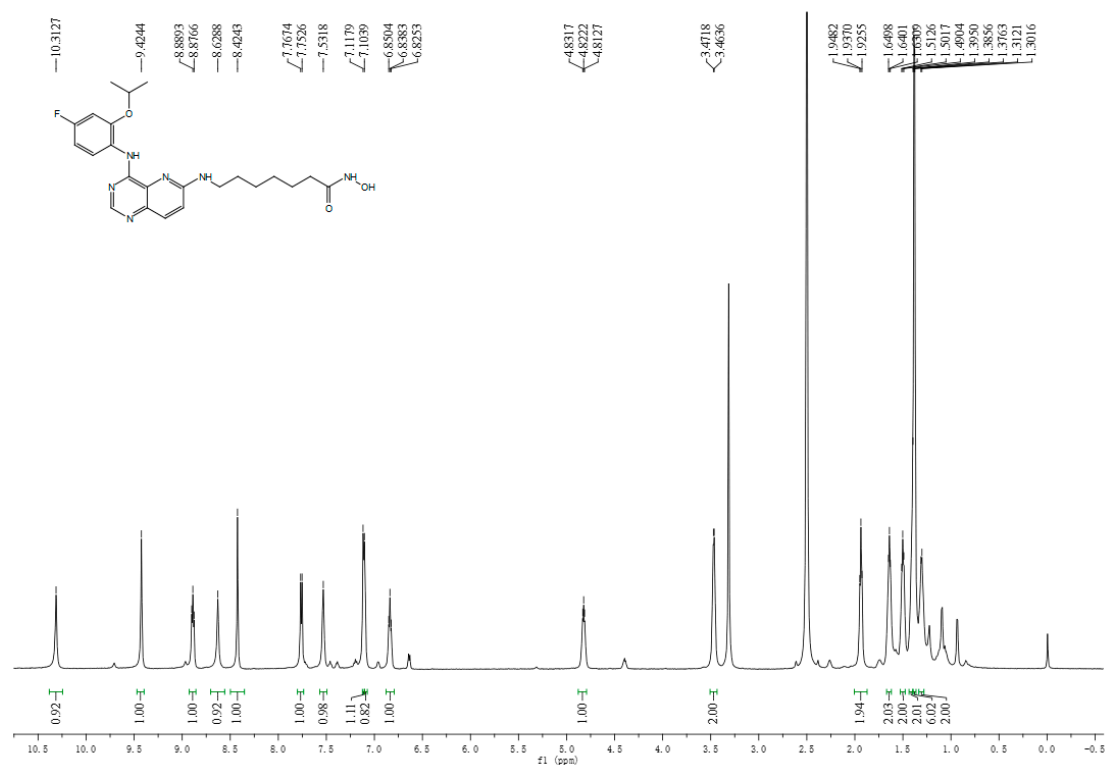**<sup>1</sup>H-NMR spectra of compound A13**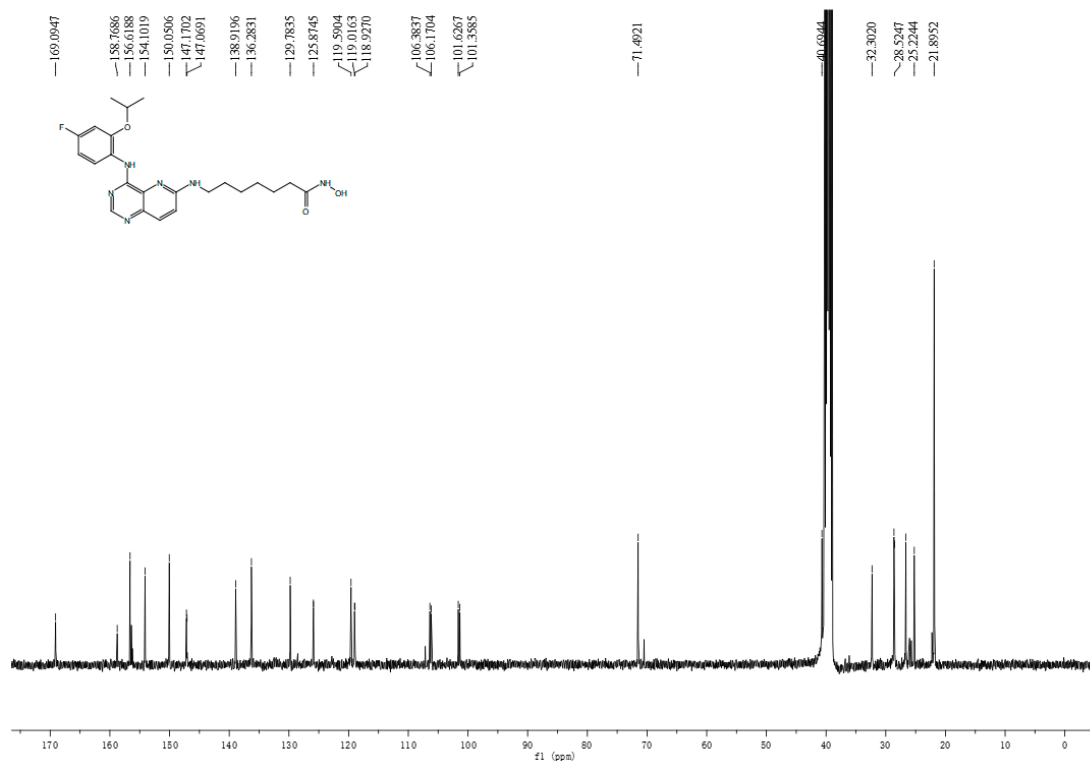**<sup>13</sup>C-NMR spectra of compound A13**

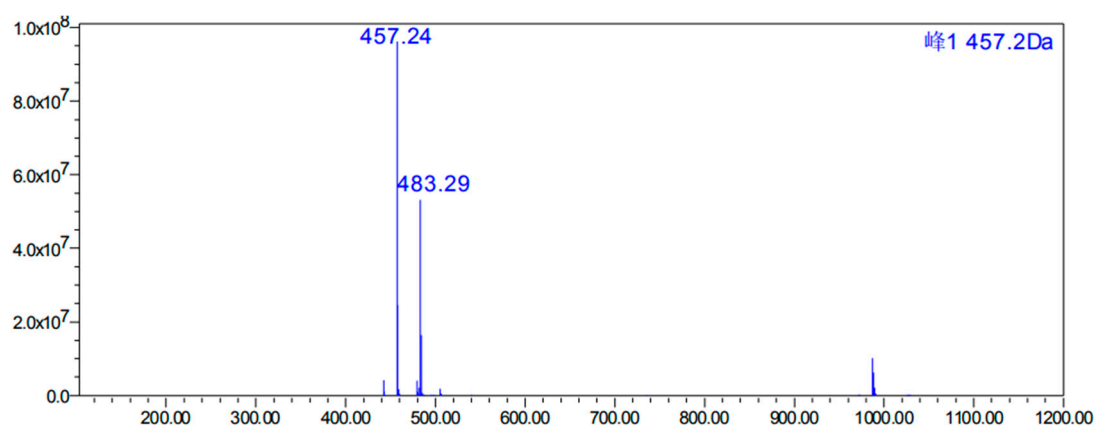

Ms spectra of compound A13

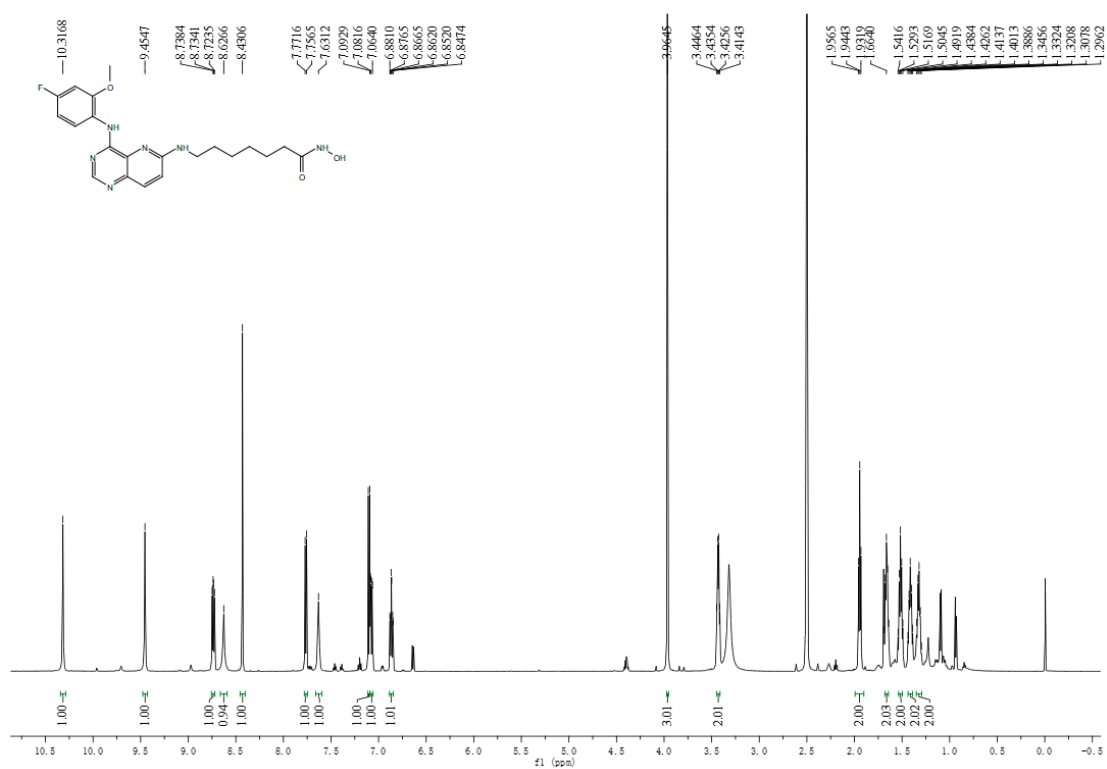

**<sup>1</sup>H-NMR spectra of compound A14**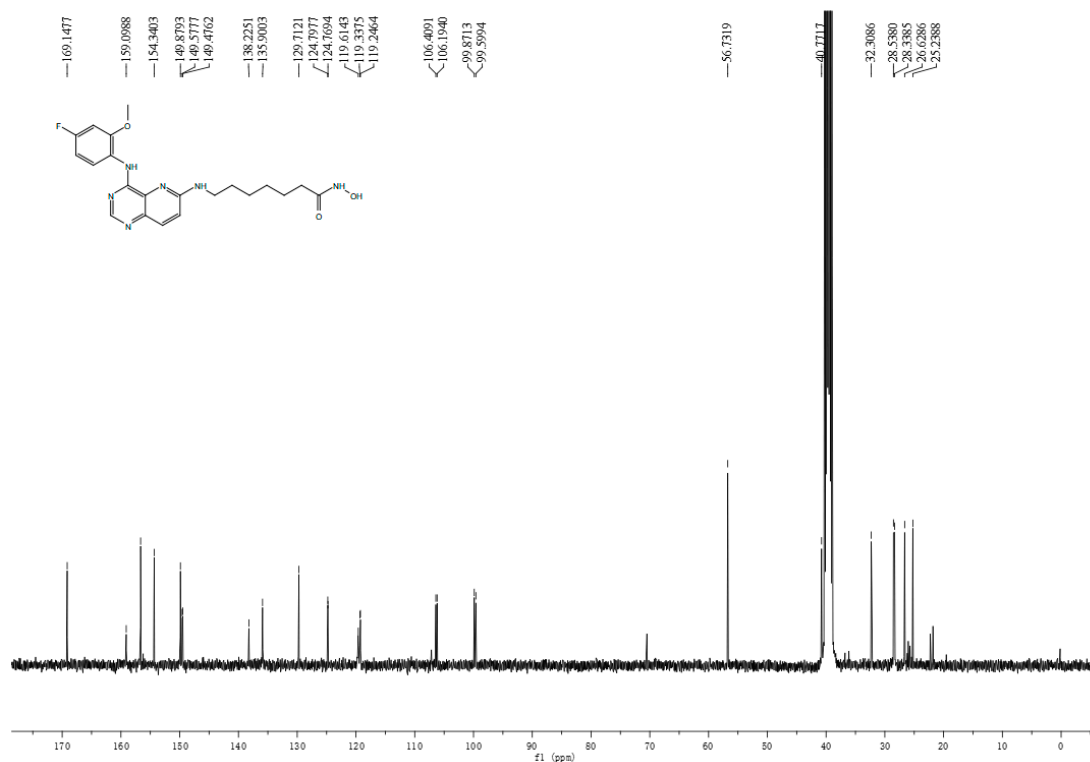**<sup>13</sup>C-NMR spectra of compound A14**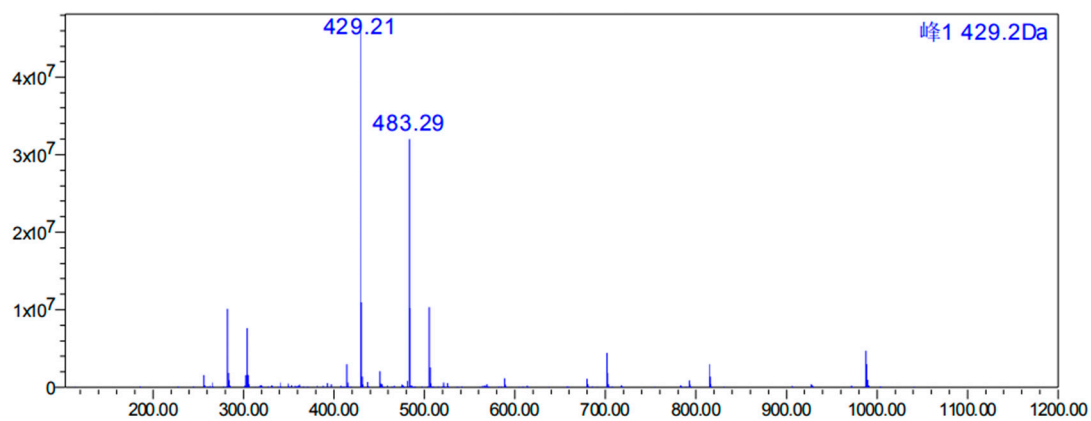**Ms spectra of compound A14**

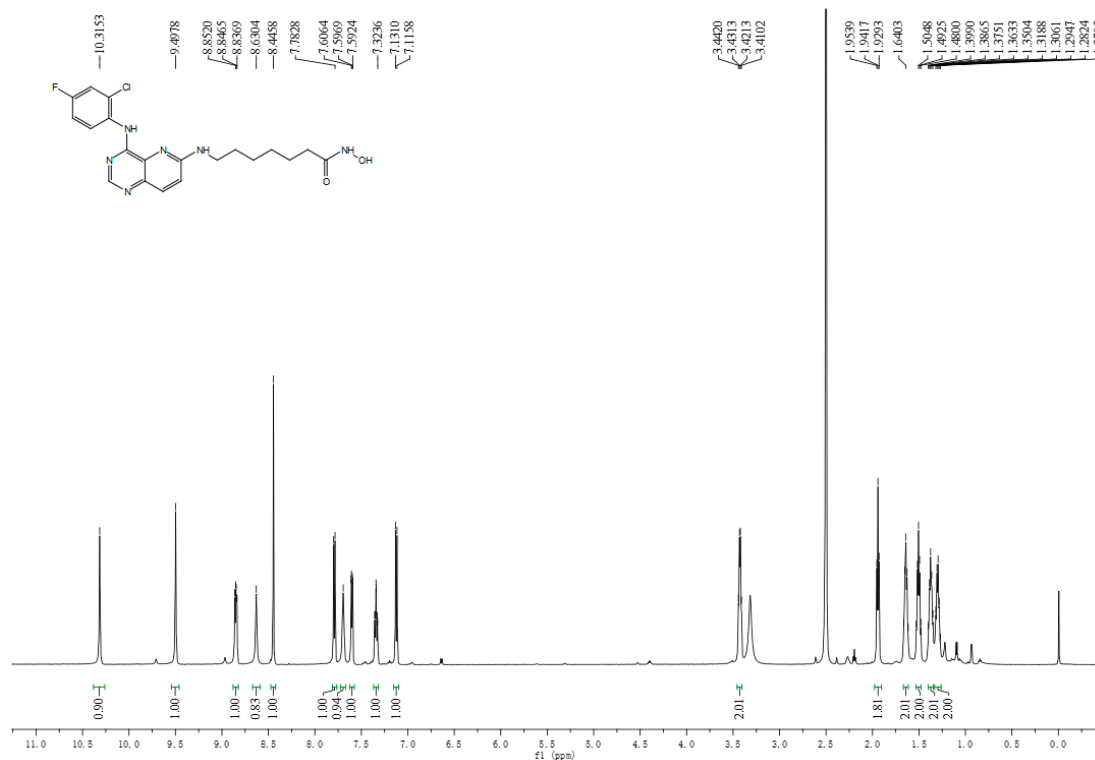

<sup>1</sup>H-NMR spectra of compound A15

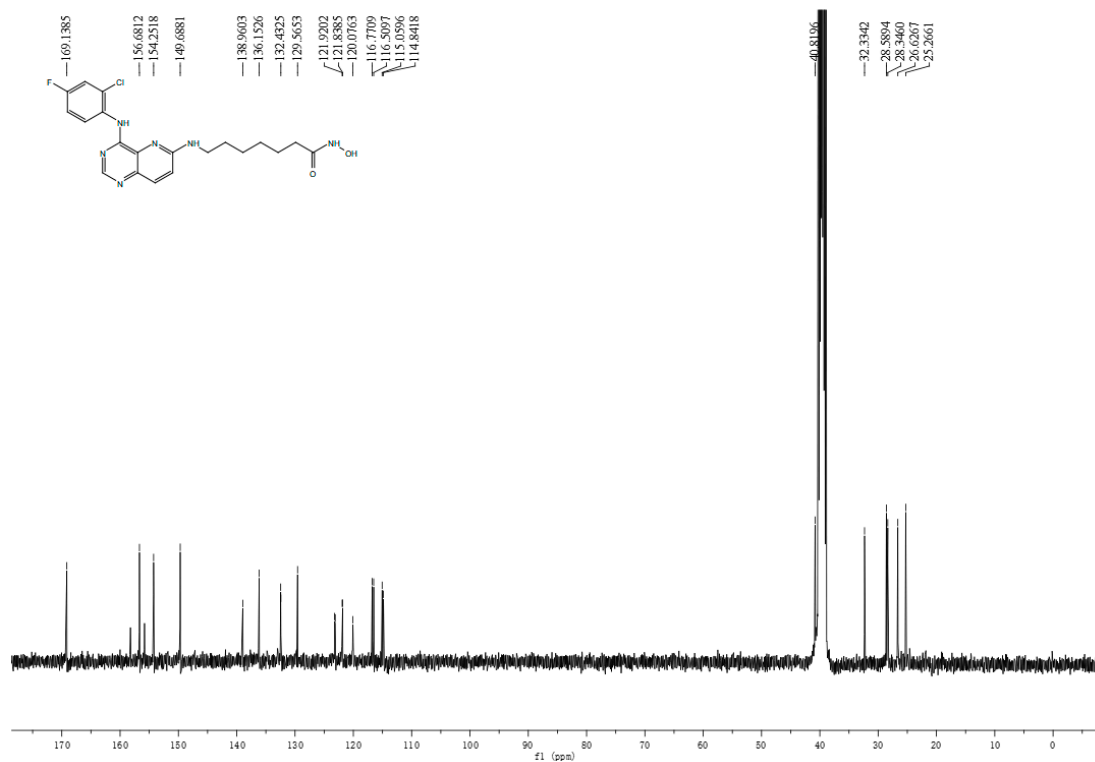

<sup>13</sup>C-NMR spectra of compound A15

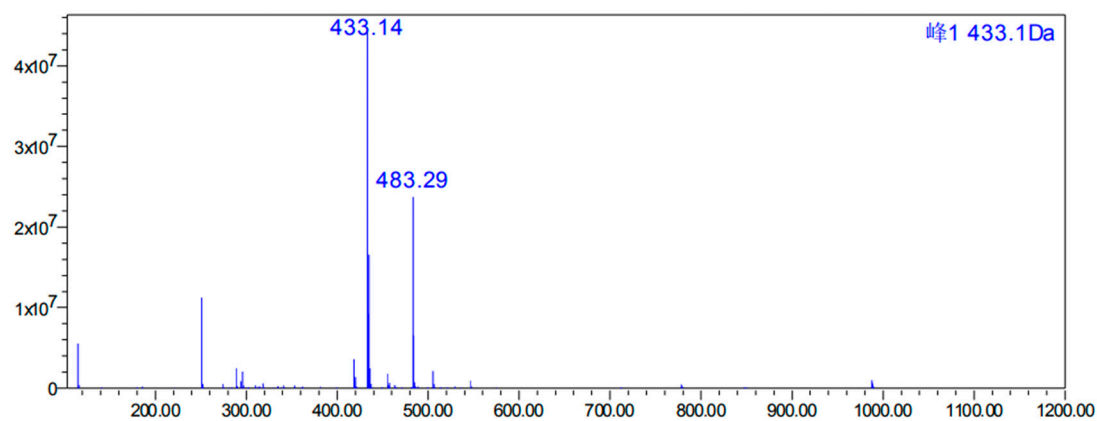

Ms spectra of compound A15

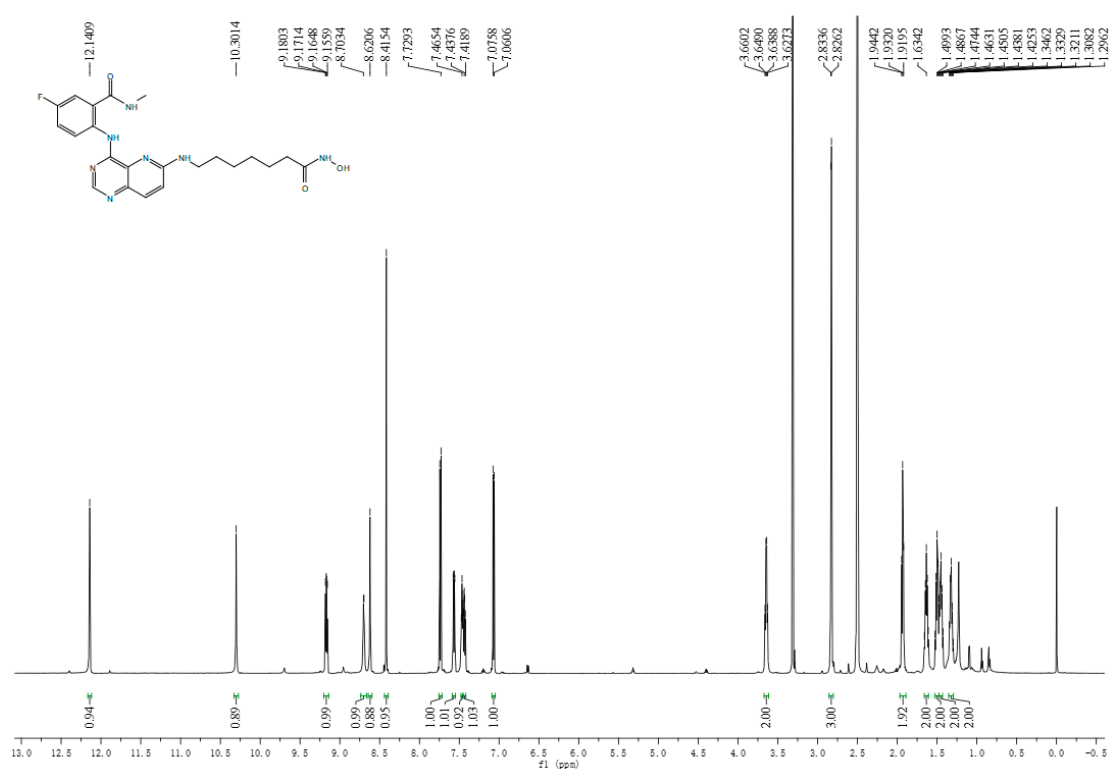



**<sup>1</sup>H-NMR spectra of compound A16**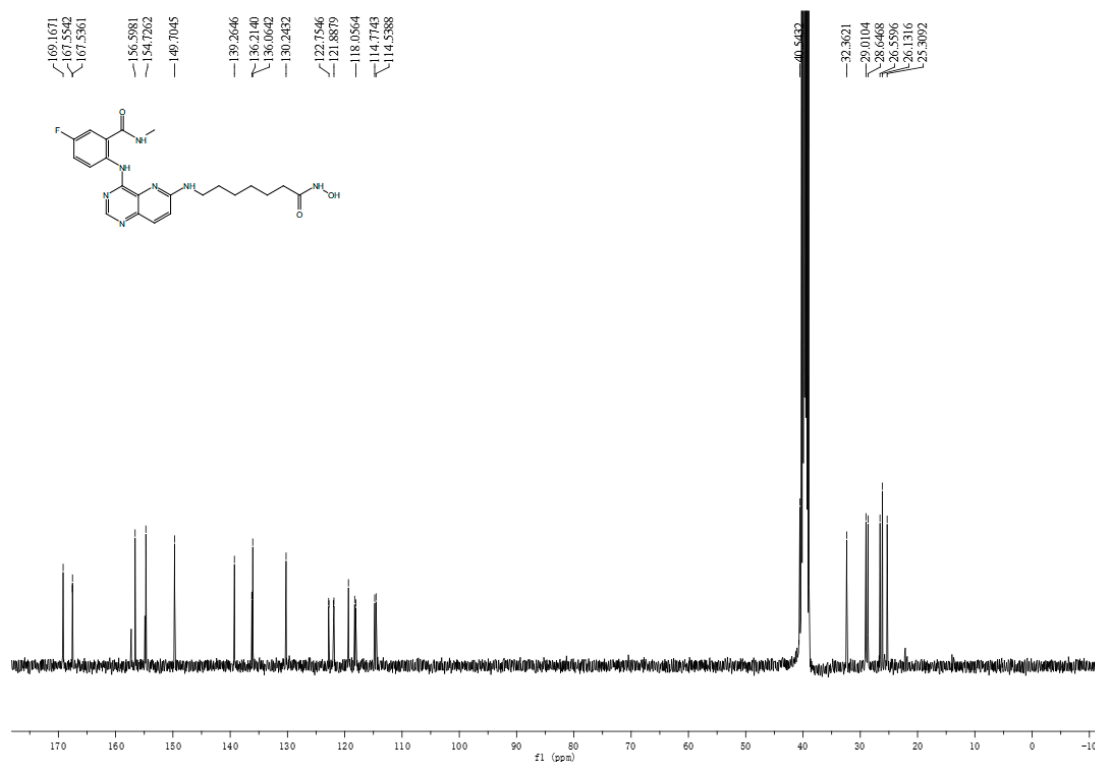**<sup>13</sup>C-NMR spectra of compound A16**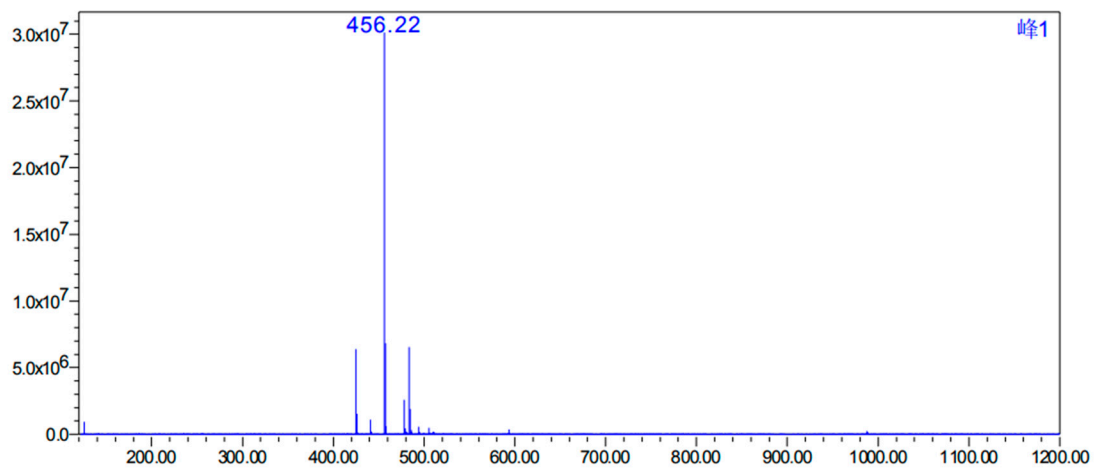**Ms spectra of compound A16**

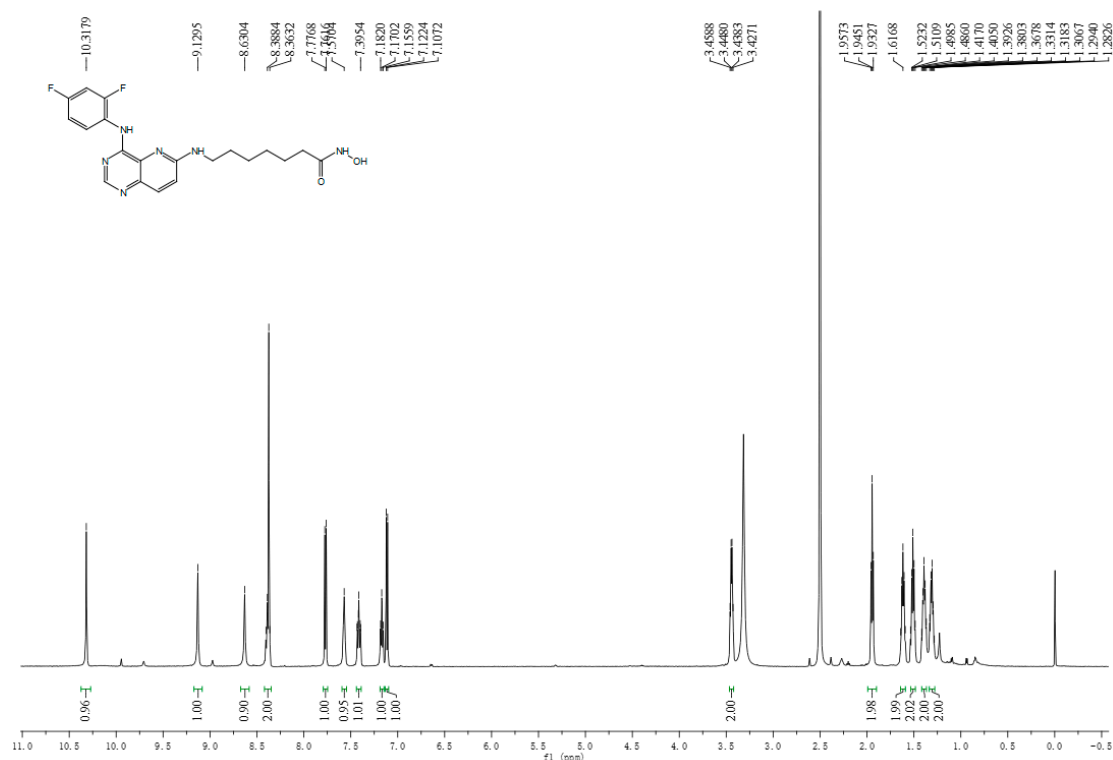**<sup>1</sup>H-NMR spectra of compound A17**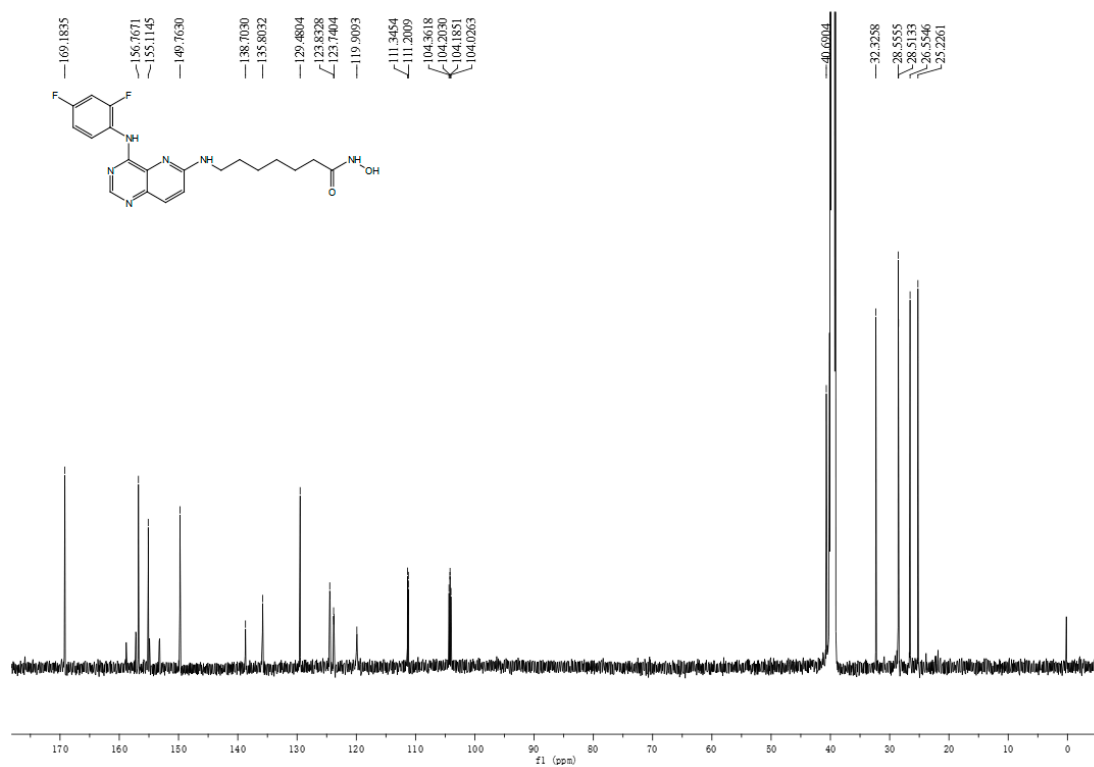**<sup>13</sup>C-NMR spectra of compound A17**

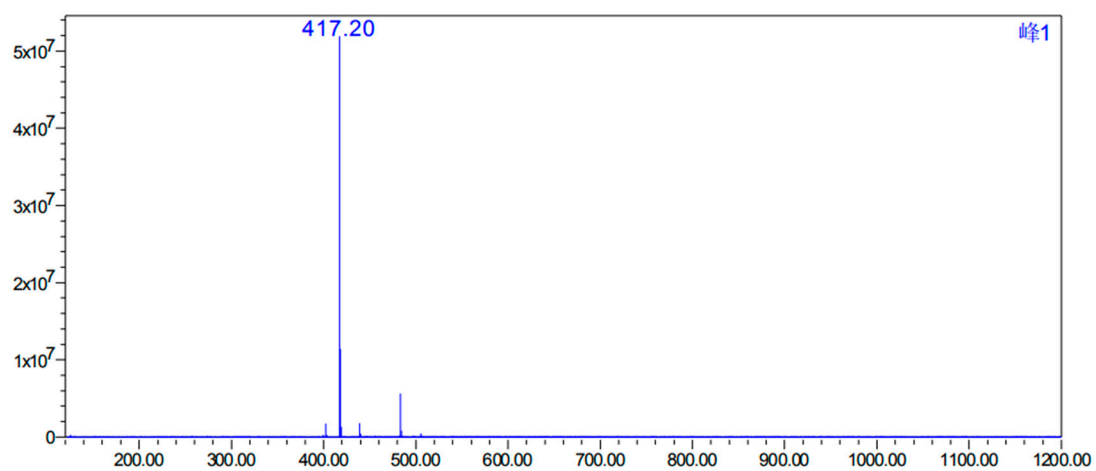

Ms spectra of compound A17

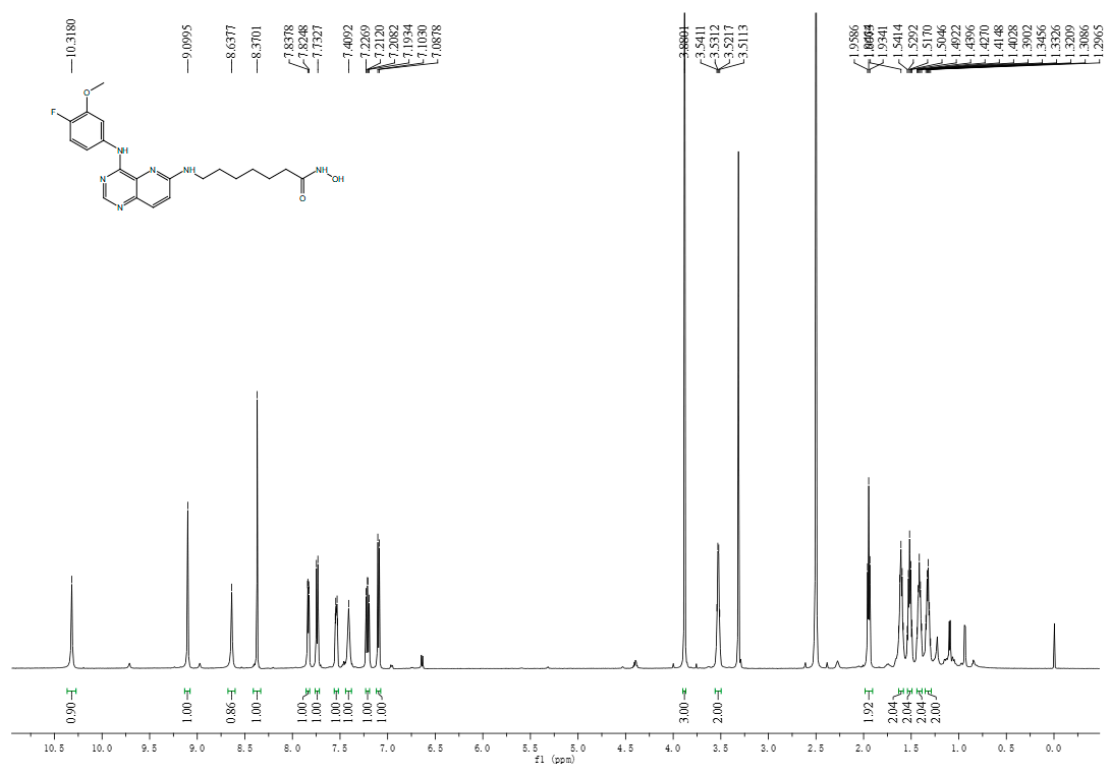

**<sup>1</sup>H-NMR spectra of compound A18**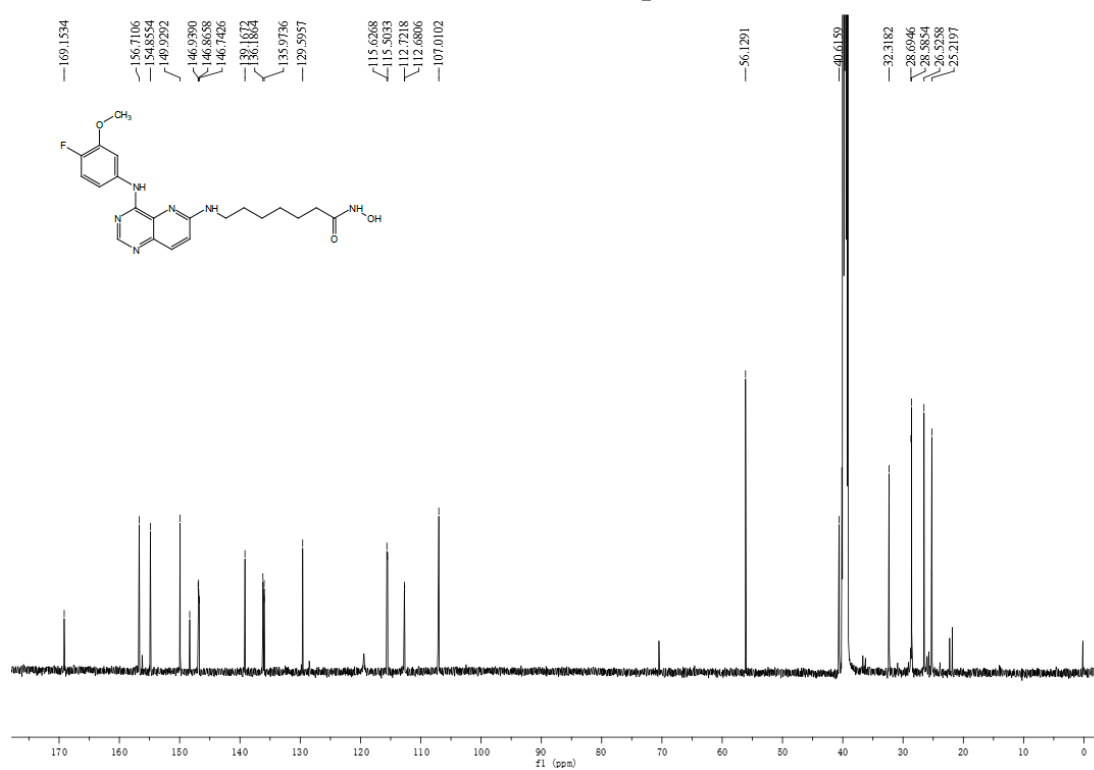**<sup>13</sup>C-NMR spectra of compound A18**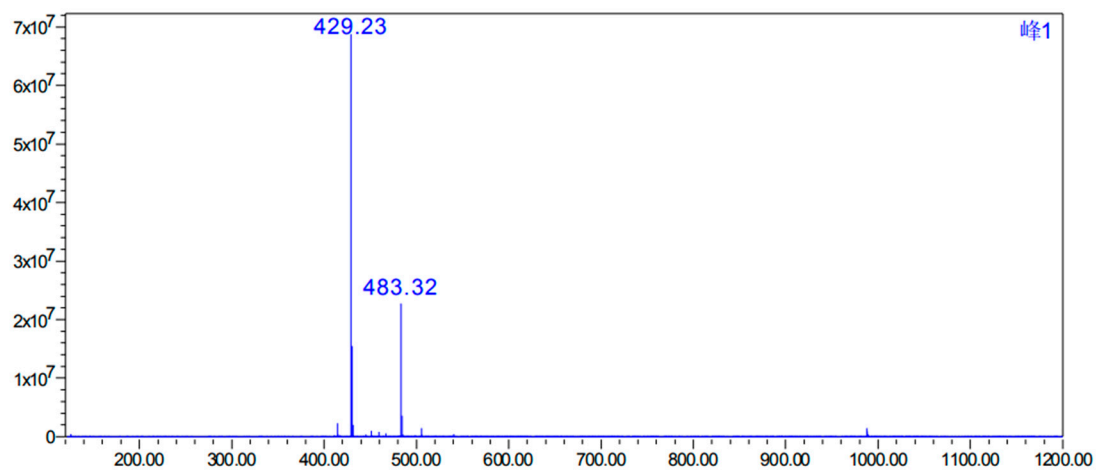**Ms spectra of compound A18**

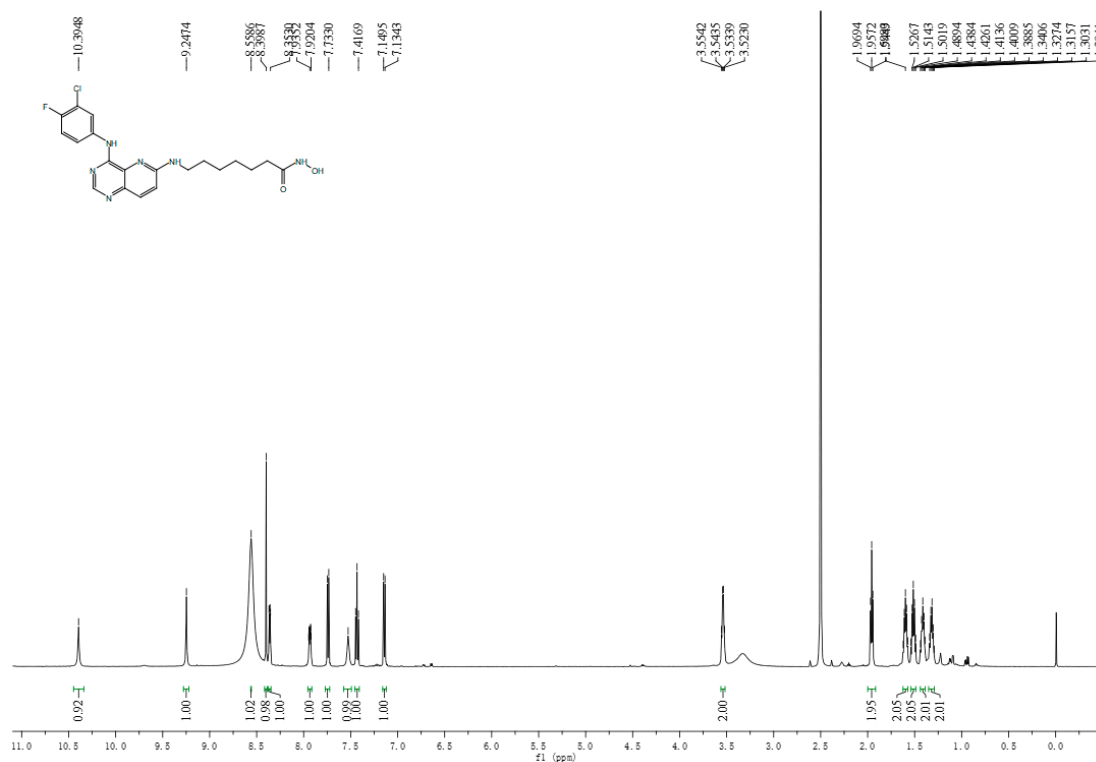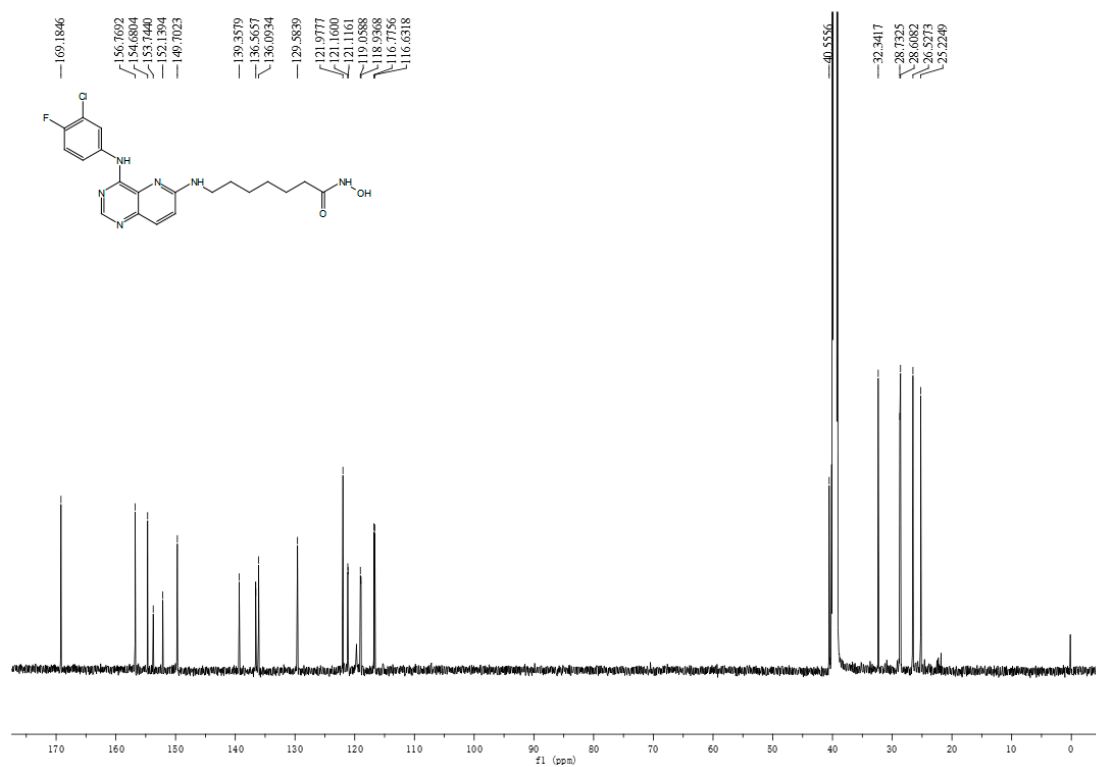

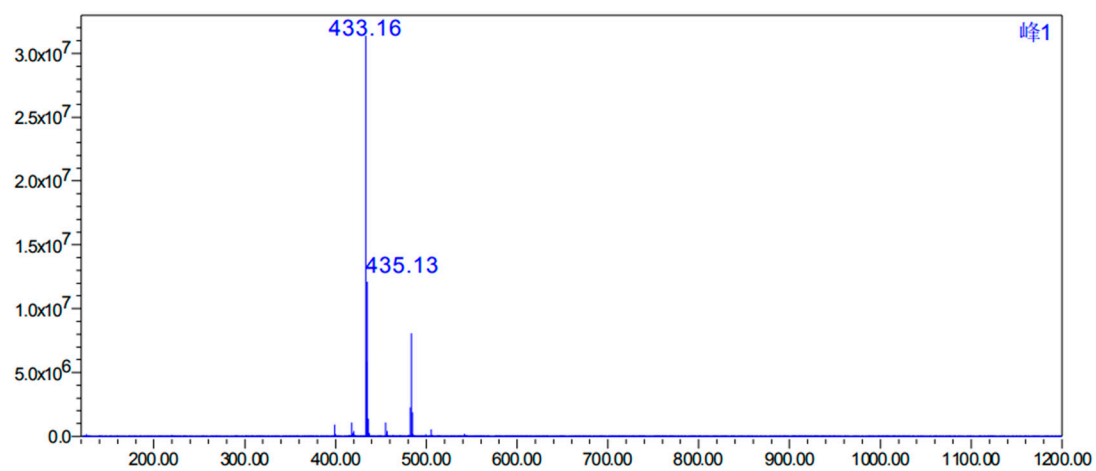

Ms spectra of compound A19
